1 **Spatial organisation and homeostasis of epithelial lineages at the**  
2 **gastroesophageal junction is regulated by the divergent Wnt mucosal**  
3 **microenvironment**

4

5 Naveen Kumar<sup>1#</sup>, Rajendra Kumar Gurumurthy<sup>2#</sup>, Pon Ganish Prakash<sup>1</sup>, Shilpa Mary  
6 Kurian<sup>1</sup>, Christian Wentland<sup>1</sup>, Volker Brinkmann<sup>2</sup>, Hans-Joachim Mollenkopf<sup>2</sup>, Tobias  
7 Krammer<sup>5</sup>, Christophe Toussaint<sup>5</sup>, Antoine-Emmanuel Saliba<sup>5</sup>, Matthias Biebl<sup>3</sup>,  
8 Christian Juergensen<sup>4</sup>, Bertram Wiedenmann<sup>4</sup>, Thomas F Meyer<sup>2,6</sup>, Cindrilla  
9 Chumduri<sup>1,2,4,\*</sup>

10

11 <sup>1</sup> Department of Microbiology, University of Würzburg, Würzburg, Germany

12 <sup>2</sup> Department of Molecular Biology, Max Planck Institute for Infection Biology, Berlin,  
13 Germany

14 <sup>3</sup> Surgical Clinic Campus Charité Mitte, Charité University Medicine, Berlin, Germany.

15 <sup>4</sup> Department of Hepatology and Gastroenterology, Charité University Medicine,  
16 Berlin, Germany.

17 <sup>5</sup> Institute for RNA-based Infection Research (HIRI), Helmholtz Center for Infection  
18 Research (HZI), Würzburg, Germany

19 <sup>6</sup> Current address: Laboratory of Infection Oncology, Institute of Clinical Molecular  
20 Biology (IKMB), Christian Albrechts University of Kiel, Kiel, Germany

21

22 #Equal first author contribution

23 \*Corresponding author

24

25 **Corresponding address:**

26 Dr Cindrilla Chumduri

27 Chair of Microbiology

28 University of Würzburg

29 97074 Würzburg, Germany

30 Mail: [cindrilla.chumduri@uni-wuerzburg.de](mailto:cindrilla.chumduri@uni-wuerzburg.de)

31 **Abstract**

32 The gastroesophageal junction (GEJ), where squamous and columnar epithelia meet,  
33 is a hotspot for Barrett's metaplasia development, dysbiosis and carcinogenesis.  
34 However, the mechanisms regulating GEJ homeostasis remain unclear. Here, by  
35 employing organoids, bulk and single-cell transcriptomics, single-molecule RNA in  
36 situ hybridisations and lineage tracing, we identified the spatial organisation of the  
37 epithelial, stromal compartment and the regulators that maintain the normal GEJ  
38 homeostasis. During development, common KRT8 progenitors generate committed  
39 unilineage p63/KRT5-squamous and KRT8-columnar stem cells responsible for the  
40 regeneration of postnatal esophagus and gastric epithelium that meet at GEJ. A  
41 unique spatial distribution of Wnt regulators in the underlying stromal compartment  
42 of these stem cells creates diverging Wnt microenvironments at GEJ and supports  
43 their differential regeneration. Further, we show that these tissue-resident stem cells  
44 do not possess the plasticity to transdifferentiate to the other lineage with the altered  
45 Wnt signals. Our study provides invaluable insights into the fundamental process of  
46 GEJ homeostasis and is crucial for understanding disease development.

## 47 **Introduction**

48 The mucosal epithelium of different organs often exposed to extrinsic factors like diet,  
49 toxins, and microbes are predisposed to carcinogenesis. Epithelial transition zones  
50 where two different epithelial types meet represent hotspots of preneoplastic  
51 metaplasia, altered microbiota and cancer development <sup>1-4</sup>. Gastroesophageal  
52 junction (GEJ) is one of those transition zones defined by the Z-line where the mucosa  
53 of the distal esophagus and the proximal stomach meet. This anatomical structure  
54 acts as a sphincter and is critical for barrier function, including preventing stomach  
55 contents from refluxing upward into the esophagus. Failure in the anti-reflux function  
56 of the GEJ leads to gastroesophageal reflux disease (GERD), a condition in which  
57 acidic stomach contents moves into the esophagus, damaging the esophageal  
58 mucosa <sup>5</sup>. GERD patients often develop Barrett's metaplasia (BE), a precursor of  
59 esophageal adenocarcinomas, characterised by the replacement of stratified  
60 squamous epithelium with glandular or intestinal-type epithelium in the esophagus.  
61 Further increasing obesity and altered microbiota trends are implicated as additional  
62 risk factors of BE and carcinogenesis <sup>6-8</sup>. Due to the deadly nature and fast-increasing  
63 incidence of GEJ adenocarcinomas accounting for a 6-fold increase during the past  
64 four decades, with a five-year survival of 15%, have gained the attention of clinicians  
65 and researchers <sup>9-12</sup>.

66 Recently, several studies presented different hypotheses for the cell of origin of BE  
67 at GEJ. These include mechanisms of transdifferentiation of the squamous  
68 esophageal epithelium to BE <sup>13-15</sup>, circulating bone marrow stem cells <sup>16</sup>, unique  
69 KRT7+ residual embryonic stem cells <sup>17</sup>, or transitional basal epithelial cells  
70 p63+/KRT5+/KRT7+ <sup>18</sup> between esophagus and stomach epithelium at the GEJ,  
71 LGR5 cells from cardia region or the first gland of the stomach <sup>1,19</sup> and submucosal  
72 glands of the esophagus <sup>20,21</sup>. However, despite these studies, epithelial lineages and  
73 mechanisms involved in epithelial regeneration, the establishment of the  
74 squamocolumnar epithelial boundary at normal adult GEJ and the role of stromal  
75 microenvironment in their homeostasis remain unknown. Clearly, Wnt signalling is  
76 essential for regulating the gastrointestinal tract homeostasis, stem cell proliferation  
77 and differentiation <sup>22,23</sup>. In addition, Wnt pathways are implicated in cancer

78 development in the stomach and esophagus<sup>24-26</sup>, and dysregulation of the Wnt  
79 pathway is associated with BE development<sup>27</sup>.

80 This study unravelled the epithelial cell types, their spatial organisation and plasticity  
81 and identified the Wnt mucosal microenvironment as a critical regulator of the  
82 squamocolumnar epithelial border homeostasis at the GEJ. During embryogenesis,  
83 the bipotent KRT8+ primitive epithelium lining of the gut mucosa differentiates into  
84 postnatal unilineage squamous and columnar epithelial stem cells. By employing  
85 mice and patient-derived organoids, lineage tracing, immunostaining and single-  
86 molecule in situ RNA hybridisation (smRNA-ISH), we found that these distinct lineage-  
87 specific stem cells are responsible for the regeneration of squamous and columnar  
88 epithelia at the GEJ. Unique spatial distribution of the Wnt regulators from the stroma  
89 underlying squamous and columnar epithelium creates a distinct Wnt inhibitory or  
90 activating microenvironment driving their regeneration and thus establishing the  
91 epithelial boundary at GEJ. Lineage tracing confirmed that Wnt signalling is critical  
92 for the differential proliferation of these distinct lineage-specific stem cells but does  
93 not drive transdifferentiation to other lineages. Bulk and single-cell sequencing of  
94 squamous and columnar organoids revealed epithelial subpopulations and molecular  
95 signatures recapitulating the in vivo squamous stratified esophageal and columnar  
96 stomach epithelium and their functions. Thus, a diverging Wnt microenvironment at  
97 GEJ establishes the borders between distinct epithelial stem cell lineages that  
98 possess different physiological functions; however, it is not involved in  
99 transdifferentiation into columnar or intestinal-type BE. These insights have  
100 implications in understanding the largely unknown mechanisms of tissue response to  
101 damage during repair and the mechanisms that contribute to metaplasia and cancer  
102 development.

## 103 **Results**

### 104 **Epithelial cell types and tissue microenvironment at the gastroesophageal** 105 **junction**

106

107 The adult human esophageal mucosa is lined with stratified squamous epithelium that  
108 meets the glandular columnar epithelium lined stomach at the gastroesophageal  
109 junction (GEJ) (Figure 1A). Whereas in the mouse, the esophagus opens into the  
110 stomach that comprises two regions- a glandular stomach and stratified squamous  
111 epithelium lined fore-stomach similar to the esophagus (Figure 1A). To gain insights  
112 into the epithelial stem cells involved in establishing the adult GEJ, we analysed the  
113 mucosal lining of the GEJ at different embryonic and adult stages. Tissue sections  
114 were made through the esophagus and entire stomach mucosa from embryonic day  
115 13 (E-13), E-16 and E-19 and fluorescence immunohistochemistry were performed  
116 for the transcription factor p63, a regulator of stratified squamous epithelium and  
117 cytokeratins KRT5, KRT8, and KRT7 (Figure 1B, Supplementary Figure 1A). On E-13,  
118 the entire stomach region consisting of simple columnar epithelial cells were labelled  
119 with KRT7 and KRT8. Further, multilayered squamous epithelial cells expressing p63  
120 without KRT5 expression appeared from the proximal esophagus to the distal region,  
121 below the KRT7+/KRT8+ simple columnar epithelium (Figure 1B-i, Supplementary  
122 Figure 1A-i). On E-16, the entire mucosa of the esophagus and forestomach was lined  
123 by p63+ squamous epithelial cells with a faint expression of KRT5 below the  
124 KRT7+KRT8+ columnar cells. Notably, near the junction, KRT7+KRT8+ precursor  
125 cells show differentiation into KRT7+KRT8+P63+KRT5- and these cells position as  
126 subcolumnar cells (Figure 1B-ii, Supplementary Figure 1A-ii). By E-19, these  
127 KRT7+KRT8+P63+KRT5- cells subsequently gain KRT5 expression but lose  
128 KRT8/KRT7 expression. The KRT7+KRT8+ expressing cells above the P63+KRT5+  
129 cells slough off, thus visibly demarcating the squamous and glandular regions of the  
130 esophagus and stomach (Figure 1B-iii, Supplementary Figure 1A-iii). In the adult  
131 mouse, the squamous cells in the esophagus were KRT5+P63+/KRT8-KRT7- and  
132 columnar cells in the stomach were KRT5-P63-/KRT8+KRT7+ (Figure 1C, D). Similar  
133 cytokeratin patterns were confirmed in the human esophagus and stomach  
134 epithelium meeting at GEJ (Figure 1H, Supplementary Figure 1B). Furthermore, the  
135 smRNA-ISH analysis revealed that *Krt5* mRNA is specifically expressed in the

136 esophageal epithelia but not in the columnar epithelium of the stomach (Figure 1E),  
137 while *Krt8* mRNA is highly expressed exclusively in the columnar epithelium of the  
138 stomach (Figure 1F). In contrast to the previous reports that a few unique KRT7+  
139 embryonic progenitor cells are retained at adult GEJ and are the precursors of BE  
140 <sup>17,18</sup>, we observed that *Krt7* expression is not confined only to the junctional region.  
141 Instead, the *Krt7* gene is highly expressed in the entire columnar stomach epithelium  
142 and, to a lesser extent, also in the basal cells of the esophagus (Figure 1G). Thus,  
143 postnatal GEJ comprises two major cell types, squamous stratified KRT5+P63+  
144 epithelial cells of the esophagus joining the KRT7+KRT8+ columnar cells of stomach  
145 cells.

146 Glandular epithelium of the stomach and its regeneration is regulated by extrinsic and  
147 cell-autonomous Wnt signalling <sup>23,28,29</sup>. However, the role of Wnt signalling in the  
148 esophagus and at GEJ is not known. Thus, we performed spatial expression analysis  
149 of genes that function as agonistic and antagonistic morphogens of the Wnt pathway  
150 in the mouse GEJ tissue. R-spondin-3 (*Rspo3*), which potentiates the Wnt signalling  
151 expressed in the myofibroblast (Myo) in both the esophagus and stomach tissue  
152 (Figure 1I-J). However, the proximity of *Rspo3* signals to the stem cell compartment  
153 of the esophagus and stomach differed. In the stomach, myofibroblasts are located  
154 proximal to the stem cells of the gastric glands, while in the esophagus, the stromal  
155 region separates basal epithelial stem and myofibroblast cells. Thus, the average  
156 distance of the *Rspo3* signal to the epithelia is greater in the esophagus than in the  
157 stomach (Figure 1J-K). Further, Wnt pathway inhibitor *DKK2* <sup>30</sup> is highly expressed in  
158 the stroma and myofibroblast cells of the esophagus and to a significantly lesser  
159 extent in myofibroblast cells in the stomach (Figure 1L-N). Thus, the squamous and  
160 columnar epithelium at GEJ are associated with spatially defined distinct Wnt  
161 microenvironments.

## 162 **Organoids of gastric and esophageal epithelium reveal distinct Wnt dependency**

163 Based on the above-observed distribution of Wnt signals in the microenvironment  
164 (Figure 1I-N), we tested the role of Wnt signalling in stemness and regeneration of  
165 gastric and esophageal epithelial types by employing organoid technology. We  
166 isolated the primary cells from the mouse esophagus and stomach, and organoids

167 were grown in the presence and absence of WNT3a, RSPO1 (W/R) containing media  
168 in addition to mEGF, mNoggin, FGF10, Nicotinamide, Forskolin, and Alk3/4/5 inhibitor  
169 A83-01. Mouse esophageal stem cells grew into mature squamous stratified  
170 esophageal epithelial organoids in both presence and absence of WNT3a and RSPO1  
171 (Figure 2A), suggesting that Wnt signalling is non-essential for the esophageal  
172 organoids formation. In contrast, as previously described <sup>29,31</sup>, Wnt signalling is  
173 essential for stomach organoid growth as the presence of WNT3a and RSPO1  
174 conditioned media was necessary for the formation of stomach organoids (Figure 2A).  
175 Strikingly, in the case of humans, the presence of WNT3a and RSPO1 showed an  
176 inhibitory effect on esophageal organoid growth, while their absence supports the  
177 growth (Figure 2E). Esophageal organoids contain multi-layered epithelium as  
178 opposed to stomach organoids which consist of the single-layered columnar  
179 epithelium with a hollow centre (Figure 2B, F). To determine the long-term growth  
180 efficiency of esophageal organoids in the presence and absence of (W/R) media, the  
181 percentage of organoid formation was quantified at passages 8 and 12. In the  
182 presence of WNT factors, esophageal organoid formation efficiency decreased from  
183 passage 8 to 12, as opposed to WNT deficient media (Figure 2C). Esophageal  
184 organoids were able to grow more than 22 passages in the absence of (W/R) media,  
185 whereas these organoids ceased to grow at passage 13 when cultured in the  
186 presence of WNT factors (Figure 2D). Thus, the Wnt signalling factors are not essential  
187 for the establishment, long-term culturing and expansion of esophageal squamous  
188 epithelial organoids as opposed to stomach columnar organoids. Cultured organoids  
189 maintained epithelial lineage specificity and morphology of esophagus (p63+, KRT5+,  
190 KRT8-, KRT7-) and stomach (P63-, KRT5-, KRT8+, KRT7+) respectively (Figure 2G-  
191 H, Figure 1C-H, Supplementary Figure 1C).

192 Further, a known marker of stomach stem cells located in the base of the gland,  
193 Leucine-rich repeat-containing G-protein coupled receptor 5 (LGR5) that binds to  
194 WNTs and WNT agonists R-spondins to activate the Wnt pathway <sup>29</sup>, was found not  
195 expressed in the esophageal epithelial cells (Figure 2J-K). *Axin-2* gene, a downstream  
196 target of the canonical Wnt-beta-catenin signalling pathway, is expressed at the base  
197 of stomach glands but not in the esophageal epithelium (Figure 2L-M). Lineage  
198 tracing of Axin2 in mice further confirmed that esophageal epithelial cells were

199 negative for Axin2 lineage while the Axin2+ cells labelled the columnar epithelium of  
200 the stomach gland (Figure 2I). Consistently, smRNA-ISH of organoids confirmed that,  
201 unlike stomach epithelium, esophageal epithelium does not express *Lgr5* or *Axin2*  
202 genes (Figure 2N-O). Thus, contrasting Wnt signals regulate the differential  
203 proliferation of esophageal squamous stratified and stomach columnar epithelial  
204 lineages at the GEJ.

### 205 **Subcellular composition and transcriptional signatures of the gastric and** 206 **esophageal epithelium**

207 To identify the regulatory signatures of squamous and columnar epithelium of GEJ,  
208 we performed a global transcriptomic analysis of the esophageal and stomach  
209 organoids. Among 34393 unique genes, 8030 genes were differentially regulated  
210 between columnar and squamous epithelium (Figure 3A, Supplementary Table 1-2).  
211 Gene ontology terms associated with the differentially expressed genes between the  
212 esophagus and stomach organoids showed enrichment of distinct pathways specific  
213 to the epithelial types (Figure 3B, Supplementary Table 3). Pathways related to the  
214 epidermal cell development, keratinocyte differentiation, transcription and translation,  
215 regulation of cell-cell adhesion were highly enriched in the esophageal epithelial cells.  
216 In the stomach epithelial cells, metabolic and catabolic processes related to lipid,  
217 fatty acids and ion transport were enriched. Corroborating to the enriched GO terms,  
218 periodic acid–Schiff (PAS) staining of organoids and the GEJ tissue showed intense  
219 PAS staining in the columnar epithelium, indicating high expression and secretion of  
220 glycoproteins, glycolipids and mucins compared to the stratified epithelium (Figure  
221 3C). Pathways related to epithelial cell proliferation, cell junction assembly, cell-  
222 substrate adhesion were similarly regulated between two epithelial lineages. Thus,  
223 these distinct organoids recapitulate the structural, functional and molecular similarity  
224 to the tissue of origin.

225 Cytokeratins are intermediate filaments that enable cells to withstand mechanical  
226 stress and innate immunity and are uniquely expressed in different epithelial types<sup>32</sup>.  
227 The analysis of the expression profile of the cytokeratins revealed that *Krt14*, *Krt15*,  
228 *Krt17*, *Krt5*, *Krt4*, *Krt13*, *Krt6a*, *Krt6b*, and *Krt16* were highly expressed in the  
229 squamous while *Krt8*, *Krt18*, *Krt7*, *Krt19*, *Krt20* are highly expressed in the columnar



230 epithelium (Supplementary Figure 2A). While bulk transcriptomics using the  
231 esophagus and stomach organoids provided important insights into the epithelial-  
232 specific expression patterns and signalling networks, it does not reveal cell type-  
233 specific expression. Thus, we applied single-cell RNA sequencing (scRNA-seq) of the  
234 stomach and esophageal organoids to gain insights into cell type-specific gene  
235 expression patterns, cell states and the cellular developmental trajectories of the  
236 epithelium. The generated scRNA-seq data of the columnar stomach and stratified  
237 squamous esophageal epithelial cells were combined to perform unsupervised  
238 clustering by dimensionality reduction and visualisation by uniform manifold  
239 approximation and projection (UMAP). The UMAP plot separated cell populations into  
240 two major clusters, one containing the columnar stomach and the other containing  
241 the esophageal epithelial cells, revealing the distinct transcriptional profiles of these  
242 two epithelial types (Figure 3D, and Supplementary Table 4). Further, cluster analysis  
243 was performed to characterise the heterogeneity and identify subpopulations within  
244 each epithelial type. Based on this analysis, these two epithelial types were further  
245 divided into seven transcriptionally distinct subclusters. The columnar epithelial cells  
246 of stomach (ST) organoids were segregated into two distinct clusters (ST-Co1, ST-  
247 Co2). In comparison, the squamous epithelial cells of esophageal (ES) organoids were  
248 segregated into five unique clusters (ES-Sq1, ES-Sq2A, ES-Sq2B, ES-Sq3A and  
249 Sq3B) (Figure 3D, and Supplementary Table 4). We observed that UMAP was able to  
250 recapitulate the differentiation stages of the columnar stomach and stratified  
251 esophageal epithelial cells. The ST-Co1 subcluster was enriched for the expression  
252 of well-known stomach stem cells markers such as *Lgr5*, *Aqp5* and *Axin2* together  
253 with high levels of *Pgc*, *Muc6*, *Gkn3* and *Atp4a* expression, which are key markers of  
254 cells present in the neck and isthmus region. These cells also expressed high levels  
255 of proliferation markers, including *Mki67*, *Pcna*, *Top2a* and *Stmn1*. The second  
256 subcluster of stomach cells, termed ST-Co2, were found to express high levels of,  
257 *Gkn1*, *Gkn2*, *Tff1* representing the pit cells of the gastric gland (Figure 3E and  
258 Supplementary Table 4)<sup>33</sup>. In contrast to the stomach, where the markers for different  
259 types of cells within the gastric gland, including stem cells and different differentiated  
260 cells, are well characterised, the knowledge regarding the characteristics of  
261 esophageal stem cells and the feature of the differentiating cells is minimal. The ES-

262 Sq1 subcluster expresses *Col7a1*, *Timm9*, *Trp63*, *Stmn1*, and *Krt17*, representing the  
263 stratified epithelium's basal cells. The ES-Sq2A subcluster was enriched for  
264 expression of *Fau*, *Gstm1*, *Jun* in addition to *Upk3lb*, and several proliferation  
265 markers, including *Mki67*, *Top2a*, *Pcna*. The subcluster ES-Sq2B was enriched for  
266 *Atf3*, *Cav1*, *Ybx1*, *Cald1* and *Sox4*. The ES-Sq3A and ES-Sq3B subclusters exhibited  
267 a gradual increase in the expression of genes such as *Rhov*, *Krt6a*, *Krt13*, *Anxa1*,  
268 *Tgm1*, *Spink5*, *Gsta5*, *Sprr3* and *Elf5* (Figure 3F, 3H, Supplementary Figure 2B-E, and  
269 Supplementary Table 5). To further understand the spatial pattern of expression of  
270 these esophageal subcellular marker proteins, we verified their expression patterns  
271 by the Human Protein Atlas (HPA) database <sup>34</sup>. The expression of proteins of the ES-  
272 Sq1 subcluster is mainly restricted to the basal cells of the esophagus epithelium.  
273 ES-Sq2A and ES-Sq2B expressed markers of the parabasal cells, excluding the basal  
274 and fully differentiated cells. The ES-Sq3A subcluster expressed markers  
275 predominantly expressed in differentiated cell layers above parabasal cells, while the  
276 ES-Sq3B subcluster genes marked the terminally differentiated layers of the  
277 esophageal epithelium. Together, our data indicate that the ES-Sq1 with  
278  $KRT17^{hi}/Jun^{Low}$  population constitute the stem cells of the healthy esophagus  
279 epithelium from which other subclusters arise by differentiation. To further validate  
280 gene expression dynamics and assign the progression of the stem cells and the path  
281 of differentiation of their descendants, we performed a pseudo-temporal  
282 reconstruction of the lineage structure using the slingshot lineage inference tool <sup>35</sup>.  
283 Pseudotemporal modelling facilitates the reconstruction of differentiation trajectories  
284 based on gene expression transition when cells change from one state to the next.  
285 This analysis revealed two distinct trajectories, all originating from the basal stem cell  
286 compartment of ES-Sq1 (Figure 3G). This was further validated by immunostaining  
287 for the KRT17, Jun and KRT6 in human and mouse tissue and organoids, revealing  
288 exclusive KRT17+/JUN- basal stem cells while the parabasal cells above expressed  
289 both KRT17 and JUN and the differentiated cells expressed high levels of Krt6 (Figure  
290 3H).

291

292 **Transcriptional signatures identify divergence of canonical and non-canonical**  
293 **Wnt pathways in gastroesophageal epithelia**

294 While Wnt signalling was critical in regulating the GEJ homeostasis (Figure 1H-J, K-  
295 M, 2J-K, L-M), much less is known about the non-canonical,  $\beta$ -catenin-independent  
296 Wnt signalling in the gastroesophageal epithelium. Our analysis unravelled that  
297 columnar epithelial cells were enriched for the canonical Wnt beta-catenin pathway  
298 genes and non-canonical Wnt/Ca<sup>2+</sup> pathway genes. In contrast, squamous epithelial  
299 cells were enriched for the non-canonical Wnt/planar cell polarity (PCP) pathway  
300 genes (Figure 4A). The genes coding for key proteins mediating canonical Wnt  
301 signalling *Axin2*, *Lrp5*, *Lrp6* and transcription factor *Tcf7* were highly upregulated in  
302 the columnar epithelium of the stomach. Also, the non-canonical Wnt/Ca<sup>2+</sup> pathway  
303 genes, including *Camk2b*, *Camk2d*, and *Nfatc2* were upregulated in stomach  
304 organoids. In contrast, only non-canonical Wnt/PCP pathway genes *Scrib*, *Rac1*,  
305 *Serpinb5*, *Daam1* and *Vangl1* were highly expressed in the squamous epithelial cells  
306 of the esophagus (Figure 4A). We further identified the distinct expression patterns of  
307 the canonical and non-canonical Wnt signalling genes in the different subpopulations  
308 of the columnar and esophageal epithelium from the scRNA seq data (Figure 4B). We  
309 found that PCP pathway genes are predominantly expressed in the differentiated  
310 cells in the squamous epithelium of the esophagus. Thus, transcriptional signatures  
311 of the squamous and columnar organoids recapitulate the difference in the stem cell  
312 characteristics, tissue structure, and diverged function of epithelial tissue of GEJ.

313 Further, we analysed the endogenous Wnt signalling in the regulation of stomach and  
314 esophageal epithelial stemness and differentiation. Stomach and esophagus  
315 organoids were grown in the presence and absence of W/R conditioned media. In  
316 addition, organoids were treated with pan canonical and non-canonical WNT  
317 secretion inhibitor IWP2<sup>36</sup>. Treatment of IWP2 did not influence growth and the size  
318 of KRT5+ stratified organoids grown in the presence or absence of W/R conditioned  
319 media (Figure 4C, E and F (upper panel)). However, the absence of W/R conditioned  
320 media and additional treatment with IWP2 led to growth inhibition of the KRT8+  
321 columnar organoids (Figure 4D, E and F (lower panel)). The addition of IWP2 to W/R  
322 conditioned media to stomach organoids led to smaller organoids than control, and  
323 most of the cells showed accelerated differentiation with high expression of Muc5Ac  
324 (Figure 4F). Our data demonstrate that KRT5+ stratified epithelial stem cell  
325 maintenance and regeneration are WNT independent while both canonical and non-

326 canonical WNT signalling play critical roles for KRT8+ columnar epithelial stemness  
327 and differentiation.

### 328 **Wnt signalling and gastroesophageal epithelial plasticity**

329 Next, we investigated if the squamous and columnar epithelial types of GEJ  
330 originate from common or distinct adult stem cells and if they possess the plasticity  
331 to transdifferentiate between stratified and columnar epithelium in the presence or  
332 absence of Wnt growth factors. We induced lineage tracing in *Krt5-Cre<sup>ERT2</sup>;Rosa26-*  
333 *tdTomato* and *Krt8-Cre<sup>ERT2</sup>;Rosa26-tdTomato* mice (Figure 5A). Cells marked for  
334 KRT5 traced for the squamous epithelium only at the GEJ and in the entire region of  
335 the esophagus but not adjacent columnar epithelial cells (Figure 5B). In contrast,  
336 KRT8 marked cells traced exclusively in the columnar epithelial cells of the stomach  
337 (Figure 5C). Thus, suggesting that two distinct epithelial stem cells give rise to KRT5+  
338 squamous lineage and KRT8+ columnar lineage that meet at GEJ. Next, we asked if  
339 these distinct epithelial stem cell lineages possess plasticity to transdifferentiate with  
340 altering Wnt growth factors. For this, epithelial cells from the esophagus and stomach  
341 were isolated from induced *Krt5-Cre<sup>ERT2</sup>;Rosa26-tdTomato* and *Krt8-Cre<sup>ERT2</sup>;Rosa26-*  
342 *tdTomato* mice and cultured as organoids in the presence or absence of W/R  
343 conditioned media. Irrespective of the presence or absence of W/R esophageal  
344 stratified organoids from *Krt5-Cre<sup>ERT2</sup>;Rosa26-tdTomato* mice were found to be  
345 labelled, whereas matched stomach columnar organoids were not (Figure 5D).  
346 Similarly, stomach columnar organoids from *Krt8-Cre;Rosa26-tdTomato* mice were  
347 found to be labelled, whereas matched esophageal stratified organoids were not  
348 labelled (Figure 5E). Further, immunofluorescence analysis confirmed that either  
349 presence or absence of Wnt factor did not change the expression of squamous  
350 specific marker KRT5 and columnar marker KRT8 in both epithelial organoid types  
351 (Figure 4F). Thus, the adult GEJ consists of two committed squamous and columnar  
352 epithelial stem cells that do not transdifferentiate with the change in the WNT  
353 microenvironment.

## 354 **Discussion:**

355 Adult mucosal tissue regeneration and maintenance depends on the balanced action  
356 of tissue-specific stem cells self-renewal, proliferation, differentiation and cell-fate  
357 commitment. The tissue microenvironment, including stromal and immune cells, is  
358 critical in regulating stem cell regeneration and maintaining normal homeostasis  
359 <sup>2,33,37,38</sup>. During tissue injury, the tissue microenvironment reprograms for the  
360 restoration of damaged tissue <sup>39</sup>. However, if the damage-inducing stimuli persist, the  
361 tissue might develop adaptive phenomena such as metaplasia to cope with the  
362 stimuli <sup>40</sup>. The gastroesophageal junction (GEJ) shows increased predisposition to the  
363 development of Barrett's metaplasia (BE), enrichment of pathogenic microbes and  
364 carcinogenesis <sup>41,42</sup>. This study unravelled the stage at which the GEJ border  
365 observed in normal adults is established during development, the epithelial cell types,  
366 plasticity and mechanisms regulating the normal GEJ homeostasis. These insights  
367 are invaluable for identifying the mechanism that deviates from normal tissue  
368 regeneration and homeostasis, contributing to disease onset.

369 Our systematic analysis of the epithelial lining of the developing esophagus and  
370 stomach from the embryonic stage to adult GEJ revealed that KRT8+/KRT7+  
371 progenitors give rise to p63-/KRT8+/KRT7+ and p63+/KRT8+/KRT7+ cells, which  
372 eventually segregated by embryonic day 19 as distinct P63+/KRT5+/KRT8-/KRT7-  
373 squamous and P63-/KRT5-/KRT8+/KRT7+ columnar cell types at the GEJ and  
374 maintained in the adult. However, previous studies proposed that embryonic  
375 progenitors that uniquely express KRT7+ <sup>17</sup> or transitional p63+/KRT5+/KRT7+ <sup>18</sup> cells  
376 reside as few cells at the GEJ and are the cell of origin of BE. In contrast, we found  
377 that KRT7 RNA and protein are highly expressed in the stomach's columnar  
378 epithelium and the basal cells of the esophageal squamous epithelium, albeit in lower  
379 levels but not restricted to a few GEJ cells. Our observation corroborates with other  
380 studies describing KRT7 expression in columnar gastric epithelial cells <sup>43</sup>, while its  
381 absence does not alter the normal function of epithelial cells or influence other  
382 cytokeratin's function <sup>44</sup>. However, increased expression of KRT7 in BE <sup>43</sup> and other  
383 cancers <sup>45</sup> might be due to increased BMP4 signals, known to regulate KRT7  
384 expression <sup>46,47</sup>. Thus, we show the existence of two distinct epithelial lineage-specific

385 stem cells that give rise to the squamous epithelium and columnar epithelium, which  
386 meet at the GEJ.

387 Signal crosstalk between the epithelium and underlying mesenchyme has been  
388 shown to direct the cellular differentiation and lineage specifications during  
389 embryogenesis<sup>48,49</sup>. Here we found that in adult GEJ, spatially defined opposing Wnt  
390 signalling crosstalk establishes the borders at the squamocolumnar junction and their  
391 regeneration. Wnt signalling regulating morphogen, RSpondin 3 (*Rspo3*) from  
392 myofibroblasts of muscularis mucosa underlying the gastric glands in the antral  
393 region of the stomach are known to regulate adult gastric stem cell regeneration<sup>28</sup>.  
394 Similarly, we found *Rspo3* expression in myofibroblasts underlying the glandular  
395 epithelium at the GEJ. Interestingly, unlike gastric glands where stem cells are  
396 proximal to *Rspo3* expressing muscularis mucosa, the basal stem cells of the  
397 esophagus and myofibroblasts are separated by wider lamina propria comprising  
398 stromal cells expressing higher levels of Wnt signalling inhibitor *Dkk2*. Consistently,  
399 growth factors inducing Wnt signalling were found to inhibit the development and  
400 long-term maintenance of stratified squamous organoids from the esophagus while  
401 supporting the development and stemness of both human and mouse gastric  
402 organoids. Thus, spatially restricted differential expression of Wnt signalling  
403 regulators underlying the adult GEJ epithelium establishes the borders. Corroborating  
404 to our observations, esophageal specification and separation from trachea during  
405 development is governed by the induction of WNT inhibitor molecules by the  
406 mesenchymal *Barx1*<sup>50,51</sup>. Likewise, similar principles were found to regulate uterine  
407 cervical squamocolumnar junction homeostasis<sup>2</sup>.

408 Comparative analysis of bulk and single-cell transcriptional profiles of esophageal  
409 and gastric organoids revealed the subcellular composition and unique properties of  
410 these epithelial tissues with distinct cytokeratin profile and their divergence in  
411 function. Squamous stratified epithelium is associated with structural regulation,  
412 including keratinocyte proliferation and differentiation, cell-cell junctions, RNA  
413 biogenesis, while columnar epithelium is associated with metabolism and catabolism  
414 of fatty acids, lipids and polysaccharides. The results from scRNAseq suggest that  
415 squamous stratified and columnar organoids recapitulate the subcellular composition  
416 of the native esophageal and gastric epithelial tissue. This data further revealed the

417 detailed molecular composition of different subcellular compartments of the  
418 esophagus epithelium, showing that the KRT17<sup>hi</sup>/Jun<sup>low</sup> cells are the stem cells of the  
419 esophagus epithelium.

420 Besides developmentally associated canonical Wnt/beta-catenin pathways, Wnt  
421 signalling also comprises less characterised non-canonical Wnt/Ca2+ pathway and  
422 Wnt/PCP pathways. We found that columnar gastric epithelium shows active  
423 canonical Wnt/beta-catenin pathways and non-canonical Wnt/Ca2+ signalling, while  
424 the non-canonical Wnt/PCP pathway is predominantly active in the stratified  
425 squamous epithelium of the esophagus. Inhibition of both canonical and non-  
426 canonical pathways in gastric epithelium revealed that extrinsic canonical Wnt is  
427 essential for the proliferation of the stem cells. In contrast, endogenous non-canonical  
428 Wnt/Ca2+ is essential for maintaining stemness and preventing differentiation of stem  
429 cells into MU5Ac foveolar pit cells. We found that Wnt/PCP signalling implicated in  
430 tissue morphogenesis and epithelial cell polarity during embryogenesis is particularly  
431 active in the parabasal cells and not essential for squamous stratified stem cell  
432 regeneration and differentiation. Moreover, alterations in the Wnt signalling did not  
433 induce transdifferentiation between columnar or squamous type epithelia.  
434 Upregulated Wnt signalling is observed in BE compared to squamous lineage at the  
435 GEJ <sup>27</sup>. However, the observed high Wnt signalling in BE could be due to differential  
436 outgrowth of columnar lineage in the esophagus.

437 In conclusion, we show that the adult stratified esophageal and columnar stomach  
438 epithelia and their subpopulations arise from distinct unilineage stem cells. The  
439 spatially defined antagonistic Wnt morphogen from the tissue microenvironment  
440 promotes differential proliferation of stomach and esophageal stem cells, thus  
441 maintaining the healthy GEJ homeostasis. Furthermore, our organoid models  
442 recapitulated the subcellular heterogeneity of the parent tissue and proved to be a  
443 powerful tool to model healthy tissue homeostasis and disease development. Thus,  
444 these fundamental insights pave the way to understand the mechanisms underlying  
445 the development and progression of pathologies at the GEJ.

## 446 **Methods**

### 447 **Mice:**

448 This study is compliant with all relevant ethical regulations regarding animal research.  
449 Animal research procedures were approved by the national legal, institutional and  
450 local authorities at the Max Planck Institute for Infection Biology. All animals were  
451 maintained in autoclaved micro isolator cages and provided sterile drinking water and  
452 chow ad libitum. Four- to twenty-week-old female mice were used for this study.  
453 Wild-type C57BL/6, *Krt5Cre<sup>ERT2</sup>*<sup>52</sup>, and *Krt8Cre<sup>ERT2</sup>*<sup>53</sup> mice were obtained from the  
454 Jackson Laboratory. *Krt5Cre<sup>ERT2</sup>* and *Krt8Cre<sup>ERT2</sup>* strains were bred to *Rosa-tdTomato*  
455 mice<sup>54</sup> to generate mice expressing a fluorophore in Cre-expressing cells. For  
456 inducing Cre recombinase for the *Krt5* or *Krt8* lineage tracing, mice were administered  
457 with tamoxifen (Sigma) intraperitoneally (0.25 mg per g body weight in 50  $\mu$ l corn oil)  
458 at week 4 for two consecutive days. Mice were euthanised at 14-20 weeks, and the  
459 gastroesophageal region was removed for further analysis. Experiments were  
460 performed in at least three biological replicates per condition. Mice were randomly  
461 allocated to experimental groups in all experiments.

462 The whole stomach was isolated from the mice at embryonic days 13, 16, 19, or  
463 postnatal mice were either used to isolate cells for organoid culture or fixed with 4%  
464 PFA for 1 hr at RT. Dehydration of the embryonic stomach was performed by  
465 immersing tissue with a series of ethanol, isopropanol, and acetone for 20 min each,  
466 followed by embedding with paraffin.

### 467 **Antibodies and Chemicals**

468 The following antibodies and chemicals were used: mouse anti-E-Cadherin (BD  
469 Biosciences, 610181), mouse-anti-E-Cadherin-488 (BD Biosciences, 560061), rabbit  
470 anti-cytokeratin 5-Alexa488 (Abcam, ab193894), mouse anti-p63 (Abcam, ab375),  
471 rabbit anti-cytokeratin 7 (Abcam, ab181598), rabbit anti-cytokeratin 7-Alexa555  
472 (Abcam, ab209601), rabbit anti-cytokeratin 8 (Abcam, ab59400), mouse anti-  
473 MUC5AC (Abcam, ab212636), rabbit anti-cytokeratin 17 (Abcam, ab109725), mouse  
474 anti-c-Jun (Abcam, ab280089), mouse anti-cytokeratin 6 (Abcam, ab18586), donkey  
475 anti-rabbit-Cy3 (Jackson Immuno Research, 711-166-152), donkey anti-rabbit-Alexa



476 Fluor 647 (Jackson Immuno Research, 647 711-605-152), donkey anti-mouse–Cy5  
477 AffiniPure (Jackson Immuno Research, 715-175-151), Hoechst (Sigma, B2261),  
478 Draq5 (Cell Signaling, 4085), DAPI (Roche, 10236276001), IWP2 (Tocris Bioscience,  
479 3533).

480

#### 481 **Organoid culture and maintenance:**

##### 482 **Epithelial stem cell isolation from the human gastroesophageal junction**

483 Human esophagus and stomach and Z line (GEJ) samples were provided by the  
484 Department of Hepatology and Gastroenterology, Charité University Medicine, Berlin,  
485 Germany. Usage for scientific research was approved by their ethics committee  
486 (EA4/034/14); informed consent was obtained from all subjects. The study is  
487 compliant with all relevant ethical regulations regarding research involving human  
488 participants. Tissue biopsies from anonymous donors were processed within 2–3h  
489 after removal. Biopsies were sourced from standard procedures.

##### 490 **Esophageal organoids**

491 Human and mouse esophageal tissue was washed with sterile PBS and was cut open  
492 longitudinally, and minced with a sterile scissor into small pieces, transferred to a 15  
493 ml centrifuge tube containing warm 3 ml 0.5 mg ml<sup>-1</sup> collagenase type II (Calbiochem,  
494 234155) solution and incubated for 30 min at 37°C shaker at 180 rpm. The tissue was  
495 mechanically disrupted with a 1 ml pipette tip by pipetting up and down ten times  
496 and centrifuged at 1000g. Pellet was resuspended with warm 3 ml TrypLE express  
497 (Gibco, 12604021), incubated for 30 minutes at 37°C in a shaker at 180 rpm. The  
498 tissue was mechanically disrupted with a 1 ml pipette tip by resuspending up and  
499 down ten times and passed through a 70 µm cell strainer (Falcon, 352350) to filter out  
500 larger tissue debris. Isolated cells were washed once with ADF++ media and  
501 resuspended with 50 µl of Matrigel (Corning, 356231) and plated on a pre-warmed 24  
502 well plate. After polymerisation of Matrigel for 10 minutes at 37°C, matrigel was  
503 overlaid with complete 3D esophageal media containing ADF medium supplemented  
504 with 12 mM HEPES, 1% GlutaMax, 1% B27, 1% N2, 50 ng ml<sup>-1</sup> murine EGF

505 (Invitrogen, PMG8043), 100 ng ml<sup>-1</sup> murine noggin (Peprotech; 250-38-100), 100 ng  
506 ml<sup>-1</sup> human FGF-10 (Peprotech, 100-26-25), 1.25 mM N-acetyl-L-cysteine, 10 mM  
507 nicotinamide, 2 μM TGF-β R kinase Inhibitor IV, 10 μM ROCK inhibitor (Y-27632), 10  
508 μM forskolin (Sigma, F6886) and 1% penicillin/streptomycin (Gibco, 15140-12).

509 As mentioned above, for human organoid culture, esophagus cells were isolated  
510 using collagenase type II and TrypLE treatment. Isolated cells were cultured in the 3D  
511 esophageal medium with similar composition as above, where EGF and noggin were  
512 replaced with human forms with 10 ng ml<sup>-1</sup> human EGF (Invitrogen, PHG0311), 100  
513 ng ml<sup>-1</sup> human noggin (Peprotech; 120-10C-1000).

#### 514 **Stomach Organoids:**

515 Mouse stomach tissue was incubated with 0.5 mM DTT/3 mM EDTA in PBS for 90  
516 minutes at RT. Tissue was transferred to the ice-cold PBS and shaken vigorously to  
517 isolate stomach glands. 100 glands were mixed with 50 μl of Matrigel and plated on  
518 a pre-warmed 24 well plate. After polymerisation of Matrigel for 10 minutes, Matrigel  
519 was overlaid with complete 3D stomach media containing ADF medium  
520 supplemented with R-spondin1 conditioned medium (25%) and Wnt3A-conditioned  
521 medium (25%), 12 mM HEPES, 1% GlutaMax, 1% B27, 1% N2, 50 ng ml<sup>-1</sup> murine  
522 EGF , 100 ng ml<sup>-1</sup> murine noggin , 100 ng ml<sup>-1</sup> human FGF-10, 1.25 mM N-acetyl-L-  
523 cysteine, 10 mM nicotinamide, 2 μM TGF-β R kinase Inhibitor IV, 10 μM ROCK  
524 inhibitor (Y-27632), 10 mM gastrin and 1% penicillin/streptomycin.

525 For human stomach organoid culture, stomach gland cells were isolated using  
526 collagenase type II treatment for 30 min, as mentioned above. Isolated cells were  
527 cultured in the Matrigel using a 3D stomach medium with similar composition as  
528 above, where EGF and noggin were replaced with human forms with 10 ng ml<sup>-1</sup>  
529 human EGF, 100 ng ml<sup>-1</sup> human noggin (10 μM SB202190 (Sigma, S7067).

#### 530 **Organoid-forming efficiency and size analysis**

531 Epithelial cells were counted, and a defined number was resuspended in 50 μl of  
532 Matrigel to generate organoids as described above. One week after plating, images  
533 were acquired from the whole well, and the number and diameter of formed organoids

534 were determined using ImageJ to calculate the organoid-forming efficiency and  
535 measurement of size.

### 536 **Immunofluorescence and microscopy**

537 Mouse gastroesophageal tissue was cut longitudinally from the antrum through the  
538 greater curvature of the stomach to the esophagus. Tissue was fixed with 4% PFA  
539 overnight at RT, dehydrated by passing through a series of ethanol, isopropanol,  
540 xylene treatment for 60 minutes in a Leica TP1020 tissue processor and embedded  
541 with paraffin. Organoids were removed from Matrigel by washing five times with ice-  
542 cold PBS and fixed with 4% PFA for 1h at RT. After washing with PBS, dehydration  
543 of organoids was performed by a series of ethanol, isopropanol, and acetone  
544 treatment for 20 min each, followed by paraffinisation.

545 For immunofluorescence staining, 5 µm paraffin sections were cut on a Microm HM  
546 315 microtome. The sections were deparaffinised, rehydrated, and treated with  
547 antigen retrieval solution (Dako, S1699). Sections were blocked using a blocking  
548 buffer (1% BSA and 2% FCS in PBS) for 1 hr at RT. Primary antibodies were diluted  
549 in blocking buffer, and sections were incubated overnight at 4°C, followed by five  
550 times PBS washes and 1 hr incubation with secondary antibodies diluted in blocking  
551 buffer along with Hoechst or Draq5. For direct fluorochrome tagged antibodies,  
552 sections were blocked with a blocking buffer for 1hr after adding a secondary  
553 antibody. Sections were washed with PBS five times and mounted using Mowiol.  
554 Images were acquired with a Leica TCS SP8 confocal microscope, or tiled images  
555 were obtained with an AxioScan.Z1 tissue imager (Zeiss), processed with Zen 2.3  
556 (Blue edition) and compiled with Adobe illustrator. Confocal images were processed  
557 with Adobe Photoshop and analysed by using Image J software.

558 GEJ tissue was fixed with 2% PFA for 1 hr at 4°C in the dark for staining lineage traced  
559 mice. Tissue was washed with PBS and freshly frozen using dry ice-cooled  
560 isopentane and OCT compound (Tissue Tek, 4583). 5 µm tissue sections were cut  
561 using Cryomicrotome, washed with PBS. Tissue sections were used for either nuclei  
562 staining or immunofluorescence, as mentioned in the method.

### 563 **Single-molecule RNA in situ hybridisation (smRNA-ISH).**

564 For single-molecule RNA in situ labelling, paraffin-embedded 10 µm tissue sections  
565 were used with RNAscope 2.5 HD Red Reagent kit (Advanced Cell Diagnostics).  
566 Hybridisations were performed according to the manufacturer's protocol. In each  
567 experiment, positive (PPIB) and negative (DapB) control probes were used according  
568 to the manufacturer's guidelines. Tiled bright-field images were acquired with Axio  
569 Scan.Z1 tissue imager (Zeiss). Images were further processed with Zen 2.3 (Blue  
570 edition) image analysis software and further compiled using Adobe Illustrator.

### 571 **RNA isolation and quality control for microarray analysis**

572 Microarrays were performed from mouse organoids cultured from esophageal and  
573 stomach epithelial stem cells (n = 3 biological replicates). Organoids were washed  
574 with ice-cold PBS and were pelleted and resuspended in 1 ml Trizol (Life  
575 Technologies), and RNA was isolated using a kit according to the manufacturer's  
576 protocol. Quantity of RNA was measured using a NanoDrop 1000 UV-Vis  
577 spectrophotometer (Kisker), and quality was assessed by Agilent 2100 Bioanalyzer  
578 with an RNA Nano 6000 microfluidics kit (Agilent Technologies).

### 579 **Microarray expression profiling**

580 Microarray experiments were performed as single-colour hybridizations on Agilent-  
581 028005 SurePrint G3 Mouse GE 8x60K, and Agilent Feature Extraction software was  
582 used to obtain probe intensities. The extracted single-colour raw data files were  
583 background corrected, quantile normalised and further analysed for differential gene  
584 expression using R and the associated BioConductor package LIMMA<sup>55</sup>. To compare  
585 esophagus and stomach gene expression, we performed an unpaired t-test. Genes  
586 with a p-Value < 0.05 and log2 fold change of – 0.5849625 and 0.5849625,  
587 corresponding to a 1.5-fold decrease, or increase in abundance, respectively, were  
588 considered differentially expressed. All statistical analysis was performed with R  
589 unless stated otherwise.

### 590 **Overrepresentation analysis of microarray data**

591 We performed an over-representation analysis (OA) on genes significantly higher  
592 expressed in the stomach or esophagus with gene sets based on GO biological

593 process gene annotations<sup>56</sup>. The analysis was performed in R using the function  
594 compareCluster from the package ClusterProfiler<sup>57</sup>. As input, we took all significantly  
595 differentially expressed genes with a valid Entrez ID, which are 3234 genes higher  
596 expressed in the stomach and 3415 genes higher expressed in the esophagus. We  
597 used the default setting of ClusterProfiler as significance cutoff, an adjusted p-Value  
598 < 0.05 adjusted with the Benjamini-Hochberg-method  
599 [<https://www.jstor.org/stable/2346101>].

## 600 **Single-cell preparation for scRNA-seq**

601 Organoids were harvested with ice-cold PBS, pelleted by centrifugation (5 Min, 300g,  
602 4°C), and Matrigel was removed. The process was repeated twice to remove Matrigel  
603 completely. Organoids were then incubated with warm TrypLE in a shaker (15 min,  
604 37°C, 180 rpm). Organoids were sheared using a 1 mL pipette by pipetting up and  
605 down 20 times. Dissociated cells were passed through a 40 µm cells strainer to obtain  
606 suspension of single cells, and the cells were washed with 0.1% BSA in 1XPBS.

## 607 **Multiplexing individual samples for scRNA-seq**

608 Following the preparation of single-cell suspension, multiplexing of samples was  
609 performed according to the MULTI-seq protocol<sup>58</sup>. The cells were counted, and a  
610 total of  $1 \times 10^6$  cells/sample were resuspended and pelleted at 1000g for 5min. The  
611 pellet was resuspended in 180µL of 3X SSC buffer with 1% BSA. To this 20µl of 20X  
612 lipid-modified DNA oligonucleotide (LMO) anchor: unique “sample barcode”  
613 oligonucleotides mix (20X= 4µM) in order to be multiplexed, with each sample  
614 receiving a different sample barcode. Samples were then incubated on ice for 5min.  
615 Then samples were supplemented with 20µl of 20X (20X= 4µM) common lipid-  
616 modified co-anchor to stabilise the membrane residence of barcodes. Samples were  
617 incubated on ice for an additional 5min. Barcode-containing media was then removed  
618 by adding 500µl of ice-cold 3X SSC containing 1% BSA to the samples and pelleted  
619 at 1000g for 5min at 4°C. The resulting cell pellet was washed again with 500µl of  
620 ice-cold 3X SSC+1% BSA, and the pellet was resuspended in 150µl of ice-cold  
621 0.125X SSC + 0.04% BSA. The resuspended cells were counted, samples were  
622 pooled together equally, and cell numbers adjusted to 1000 cells/µl.

## 623 **scRNA-seq library preparation and MULTIseq**

624 A 10x Chromium Controller was used to partition single cells into nanolitre-scale Gel-  
625 Bead-In-EMulsions (GEMs). Approximately 2500 cells per sample were pooled and  
626 loaded onto the controller. Single-cell suspensions were processed using the 10x  
627 Genomics Single Cell 3' v3.1 RNA-seq kit. Reverse transcription, cDNA amplification  
628 and construction of the gene expression libraries were prepared following the detailed  
629 protocol provided by 10x Genomics. After the cDNA Amplification step, the  
630 MULTIseq barcode fraction was separated and processes according to the  
631 MULTIseq protocol<sup>58</sup>. A SimpliAmp Thermal Cycler (Applied Biosystems) was used  
632 for amplification and incubations. Libraries were quantified by Qubit™ 3.0  
633 Fluorometer (ThermoFisher), and quality was checked using a 2100 Bioanalyzer with  
634 a High Sensitivity DNA kit (Agilent). Sequencing was performed in paired-end mode  
635 with an S1 100-cycles kit using Novaseq 6000 sequencer (Illumina).

## 636 **Processing of raw sequencing data**

637 Sequencing data was processed using the CellRanger (v3.1.0) pipeline from 10x  
638 Genomics. Generation of FASTQ files for both gene expression and MULTI-seq  
639 libraries was achieved from the raw sequencing data using the “cellranger mkfastq”  
640 command with default parameters. We then used “cellranger count” with default  
641 parameters to perform alignment against the mm10 build of the mouse genome, UMI  
642 counting and for generating the feature barcode matrix.

## 643 **scRNA-Seq sample De-Multiplexing**

644 In order to determine the sample origin of each cellular barcode, the generated  
645 MULTI-seq FASTQ files were processed using the R package deMULTIplex (v1.0.2)<sup>58</sup>.  
646 The resulting sample barcode UMI count matrix data was fed as the input for MULTI-  
647 seq sample classification, by which cells from the same sample were grouped.  
648 Suspected cells that were positive for more than one sample barcode were classified  
649 as doublets. In general, sample multiplexing is not a perfect process in which small  
650 groups of cells can remain 'negative' without falling into any of the sample groups.

651 Therefore, a semi-supervised negative cell reclassification was performed using the  
652 functions ‘findReclassCells’ and ‘rescueCells’ to rescue the negative cells. These  
653 rescued (re-classified) cells were added back to their respective predicted sample  
654 groups. Finally, each cell containing the information regarding the sample group  
655 (including negatives and doublets) was utilised for scRNA sequencing downstream  
656 analysis.

### 657 **single-cell RNA-seq data quality control, normalisation and clustering**

658 The obtained filtered gene expression matrix was analysed using R software (v.4.0.3)  
659 with the Seurat <sup>59</sup> package (v.4.0.0). The demultiplexed sample barcode UMI  
660 information was incorporated into the gene expression matrix. We chose to omit  
661 unrescued cells (negatives and doublets) from the data for further analysis, resulting  
662 in 1099 cells. As a next step, we scrutinised for potential doublets by neglecting  
663 barcodes with less than 100 genes, more than 8500 genes and more than 80,000  
664 UMI counts. Low-quality cells with more than 20% of the UMIs derived from the  
665 mitochondrial genome were excluded. Ultimately, we split each unique sample into a  
666 separate Seurat object based on the MULTI-seq sample barcodes, which contained  
667 765 cells from the esophagus and 90 cells from stomach samples designated for  
668 further downstream analyses. Normalisation and variance stabilisation of these  
669 objects was performed using a negative binomial regression model provided by the  
670 sctransform <sup>60</sup> package (v.0.3.2), which also identified the highly variable genes. In  
671 addition, the mitochondrial mapping percentage and cell cycle scores (calculated  
672 using CellCycleScoring command) were regressed out during data normalisation and  
673 scaling. Dimensionality reduction of the data was performed using the RunPCA  
674 function with default parameters. Clustering was done using the FindNeighbors and  
675 FindClusters functions on the top 30 principal components, which was then  
676 visualised by implementing a nonlinear dimensionality reduction with the RunUMAP  
677 function. We identified a set of cells with erroneously annotated sample barcodes,  
678 which might be due to the negative cell reclassification during the demultiplexing  
679 process. Hence, we carefully assessed for the presence of such other cells, (e.g.  
680 mixup cells/doublets with substantial and coherent expression profiles of a hybrid  
681 transcriptome based on columnar and squamous epithelial marker gene expression

682 (*Krt8/18* and *Krt5/14/6a/13*, respectively) and excluded them from further analysis. As  
683 an outcome, UMAP was derived from analysing a total of 612 cells from esophagus  
684 and stomach samples combined (Figure 3D). To further unravel the subpopulations  
685 present within the data, we reclustered the esophageal and stomach cell clusters  
686 separately by repeating the aforementioned workflow for dimensionality reduction  
687 and clustering.

### 688 **Cell-Type Annotation and differential gene expression identification**

689 Cells were projected into 2D space after performing dimensionality reduction and  
690 were clustered together based on their transcriptional similarities. The resulting cell  
691 clusters were annotated based on specific canonical marker genes (Figure 3E-F).  
692 Additionally, to identify genes that would discriminate these clusters, we used the  
693 FindAllMarkers command with default Wilcoxon rank-sum test in Seurat to identify  
694 the differentially expressed genes between cell clusters/type with default parameters  
695 (Supplementary Tables 4-5).

### 696 **Trajectory Inference/Pseudotime Analysis**

697 Developmental trajectories in the data were modelled using the Slingshot<sup>35</sup> package  
698 (v.1.6.1). We identified the global lineage structure using the minimum spanning tree  
699 (MST) approach provided by the getLineages function. This resulted in different  
700 smoothed lineages, which were modelled by fitting simultaneous principal curves  
701 using the getCurves function and also the information regarding how the cells are  
702 ordered in each lineage based on pseudotime values.

### 703 **Statistics and reproducibility.**

704 GraphPad Prism (v.8) was used for statistical calculations and the generation of plots.  
705 The data are displayed as mean $\pm$ s.e.m.  $P < 0.05$  was considered to be statistically  
706 significant. Each experiment was repeated independently with similar results.

### 707 **Human Protein Atlas analysis of esophageal subcluster marker genes**

708 To find the spatial distribution of our selected subcluster specific markers at the  
709 protein level (Figure 3F), we scanned the HPA database (<http://www.proteinatlas.org>,



710 v20.1), which provides information on the tissue and cell distribution of human  
711 proteins based on immunostaining.

## 712 **Acknowledgements**

713 We thank M. Drabkina, K. Hoffman for technical assistance; I. Wagner for the  
714 microarrays; D. Son for help with sample preparations. N.K. is supported by Deutsche  
715 Forschungsgemeinschaft Deutscher Akademischer Austauschdienst (DAAD) and  
716 Deutsche Forschungsgemeinschaft Graduiertenkolleg DFG-GRK2157, P.G.P is  
717 supported by the DFG-GRK 2157. C.C. is supported by University Würzburg and  
718 DFG-GRK 2157. The funders had no influence on the study design or analysis of the  
719 data.

## 720 **Author contributions**

721 C.C., R.K.G. conceived the study; C.C. R.K.G. and N.K. designed the experiments,  
722 performed and analysed the data; N.K. and C.C. prepared the single cells for scRNA  
723 seq; S.M.K contributed to IHC experiments; T.K, C.T and A.-E.S performed the  
724 multiplexed scRNA-seq and raw data pre-processing; P.G.P performed scRNA-seq  
725 bioinformatics analysis, and C.W. performed microarray bioinformatics analysis with  
726 the help of C.C. N.K and R.K.G; V.B. contributed Axioscan imaging; H.-J.M.  
727 contributed microarray studies; T.F.M provided the infrastructure and advice; C.J.,  
728 M.B. and B.W. provided human samples; N.K. R.K.G and C.C. wrote the manuscript.

729

## References

- 730 1 Quante, M. *et al.* Bile acid and inflammation activate gastric cardia stem cells  
731 in a mouse model of Barrett-like metaplasia. *Cancer Cell* **21**, 36-51,  
732 doi:10.1016/j.ccr.2011.12.004 (2012).
- 733 2 Chumduri, C. *et al.* Opposing Wnt signals regulate cervical squamocolumnar  
734 homeostasis and emergence of metaplasia. *Nat Cell Biol* **23**, 184-197,  
735 doi:10.1038/s41556-020-00619-0 (2021).
- 736 3 McNairn, A. J. & Guasch, G. Epithelial transition zones: merging  
737 microenvironments, niches, and cellular transformation. *Eur J Dermatol* **21**  
738 **Suppl 2**, 21-28, doi:10.1684/ejd.2011.1267 (2011).
- 739 4 Schmoeckel, E. *et al.* LEF1 is preferentially expressed in the tubal-peritoneal  
740 junctions and is a reliable marker of tubal intraepithelial lesions. *Mod Pathol*  
741 **30**, 1241-1250, doi:10.1038/modpathol.2017.53 (2017).
- 742 5 Mittal, R. & Vaezi, M. F. Esophageal Motility Disorders and Gastroesophageal  
743 Reflux Disease. *N Engl J Med* **383**, 1961-1972, doi:10.1056/NEJMra2000328  
744 (2020).
- 745 6 Paulson, T. G. & Reid, B. J. Focus on Barrett's esophagus and esophageal  
746 adenocarcinoma. *Cancer Cell* **6**, 11-16, doi:10.1016/j.ccr.2004.06.021 (2004).
- 747 7 Elliott, J. A. & Reynolds, J. V. Visceral Obesity, Metabolic Syndrome, and  
748 Esophageal Adenocarcinoma. *Front Oncol* **11**, 627270,  
749 doi:10.3389/fonc.2021.627270 (2021).
- 750 8 Lv, J. *et al.* Alteration of the esophageal microbiota in Barrett's esophagus and  
751 esophageal adenocarcinoma. *World J Gastroenterol* **25**, 2149-2161,  
752 doi:10.3748/wjg.v25.i18.2149 (2019).
- 753 9 Reid, B. J., Li, X., Galipeau, P. C. & Vaughan, T. L. Barrett's oesophagus and  
754 oesophageal adenocarcinoma: time for a new synthesis. *Nat Rev Cancer* **10**,  
755 87-101, doi:10.1038/nrc2773 (2010).
- 756 10 Crane, S. J. *et al.* Survival trends in patients with gastric and esophageal  
757 adenocarcinomas: a population-based study. *Mayo Clin Proc* **83**, 1087-1094,  
758 doi:10.4065/83.10.1087 (2008).
- 759 11 Younes, M., Henson, D. E., Ertan, A. & Miller, C. C. Incidence and survival  
760 trends of esophageal carcinoma in the United States: racial and gender  
761 differences by histological type. *Scand J Gastroenterol* **37**, 1359-1365,  
762 doi:10.1080/003655202762671215 (2002).
- 763 12 Pohl, H. & Welch, H. G. The role of overdiagnosis and reclassification in the  
764 marked increase of esophageal adenocarcinoma incidence. *J Natl Cancer Inst*  
765 **97**, 142-146, doi:10.1093/jnci/dji024 (2005).
- 766 13 Milano, F. *et al.* Bone morphogenetic protein 4 expressed in esophagitis  
767 induces a columnar phenotype in esophageal squamous cells.  
768 *Gastroenterology* **132**, 2412-2421, doi:10.1053/j.gastro.2007.03.026 (2007).
- 769 14 Kong, J., Crissey, M. A., Funakoshi, S., Kreindler, J. L. & Lynch, J. P. Ectopic  
770 Cdx2 expression in murine esophagus models an intermediate stage in the  
771 emergence of Barrett's esophagus. *PLoS One* **6**, e18280,  
772 doi:10.1371/journal.pone.0018280 (2011).
- 773 15 Kosoff, R. E. *et al.* Development and characterization of an organotypic model  
774 of Barrett's esophagus. *J Cell Physiol* **227**, 2654-2659, doi:10.1002/jcp.23007  
775 (2012).

- 776 16 Sarosi, G. *et al.* Bone marrow progenitor cells contribute to esophageal  
777 regeneration and metaplasia in a rat model of Barrett's esophagus. *Dis*  
778 *Esophagus* **21**, 43-50, doi:10.1111/j.1442-2050.2007.00744.x (2008).
- 779 17 Wang, X. *et al.* Residual embryonic cells as precursors of a Barrett's-like  
780 metaplasia. *Cell* **145**, 1023-1035, doi:10.1016/j.cell.2011.05.026 (2011).
- 781 18 Jiang, M. *et al.* Transitional basal cells at the squamous-columnar junction  
782 generate Barrett's oesophagus. *Nature* **550**, 529-533,  
783 doi:10.1038/nature24269 (2017).
- 784 19 O'Neil, A., Petersen, C. P., Choi, E., Engevik, A. C. & Goldenring, J. R. Unique  
785 Cellular Lineage Composition of the First Gland of the Mouse Gastric Corpus.  
786 *J Histochem Cytochem* **65**, 47-58, doi:10.1369/0022155416678182 (2017).
- 787 20 Leedham, S. J. *et al.* Individual crypt genetic heterogeneity and the origin of  
788 metaplastic glandular epithelium in human Barrett's oesophagus. *Gut* **57**,  
789 1041-1048, doi:10.1136/gut.2007.143339 (2008).
- 790 21 Owen, R. P. *et al.* Single cell RNA-seq reveals profound transcriptional  
791 similarity between Barrett's oesophagus and oesophageal submucosal  
792 glands. *Nat Commun* **9**, 4261, doi:10.1038/s41467-018-06796-9 (2018).
- 793 22 Verzi, M. P. & Shivdasani, R. A. Wnt signaling in gut organogenesis.  
794 *Organogenesis* **4**, 87-91, doi:10.4161/org.4.2.5854 (2008).
- 795 23 Flanagan, D. J., Austin, C. R., Vincan, E. & Pheesse, T. J. Wnt Signalling in  
796 Gastrointestinal Epithelial Stem Cells. *Genes (Basel)* **9**,  
797 doi:10.3390/genes9040178 (2018).
- 798 24 Koushyar, S., Powell, A. G., Vincan, E. & Pheesse, T. J. Targeting Wnt Signaling  
799 for the Treatment of Gastric Cancer. *Int J Mol Sci* **21**,  
800 doi:10.3390/ijms211113927 (2020).
- 801 25 Moghbeli, M., Abbaszadegan, M. R., Golmakani, E. & Forghanifard, M. M.  
802 Correlation of Wnt and NOTCH pathways in esophageal squamous cell  
803 carcinoma. *J Cell Commun Signal* **10**, 129-135, doi:10.1007/s12079-016-  
804 0320-3 (2016).
- 805 26 Deng, F., Zhou, K., Cui, W., Liu, D. & Ma, Y. Clinicopathological significance of  
806 wnt/beta-catenin signaling pathway in esophageal squamous cell carcinoma.  
807 *Int J Clin Exp Pathol* **8**, 3045-3053 (2015).
- 808 27 Lyros, O. *et al.* Wnt/beta-Catenin Signaling Activation beyond Robust Nuclear  
809 beta-Catenin Accumulation in Nondysplastic Barrett's Esophagus: Regulation  
810 via Dickkopf-1. *Neoplasia* **17**, 598-611, doi:10.1016/j.neo.2015.07.006 (2015).
- 811 28 Sigal, M. *et al.* Stromal R-spondin orchestrates gastric epithelial stem cells and  
812 gland homeostasis. *Nature* **548**, 451-455, doi:10.1038/nature23642 (2017).
- 813 29 Barker, N. *et al.* Lgr5(+ve) stem cells drive self-renewal in the stomach and  
814 build long-lived gastric units in vitro. *Cell Stem Cell* **6**, 25-36,  
815 doi:10.1016/j.stem.2009.11.013 (2010).
- 816 30 Mao, B. & Niehrs, C. Kremen2 modulates Dickkopf2 activity during Wnt/LRP6  
817 signaling. *Gene* **302**, 179-183, doi:10.1016/s0378-1119(02)01106-x (2003).
- 818 31 Bartfeld, S. *et al.* In vitro expansion of human gastric epithelial stem cells and  
819 their responses to bacterial infection. *Gastroenterology* **148**, 126-136 e126,  
820 doi:10.1053/j.gastro.2014.09.042 (2015).
- 821 32 Jacob, J. T., Coulombe, P. A., Kwan, R. & Omary, M. B. Types I and II Keratin  
822 Intermediate Filaments. *Cold Spring Harb Perspect Biol* **10**,  
823 doi:10.1101/cshperspect.a018275 (2018).

- 824 33 Xiao, S. & Zhou, L. Gastric Stem Cells: Physiological and Pathological  
825 Perspectives. *Front Cell Dev Biol* **8**, 571536, doi:10.3389/fcell.2020.571536  
826 (2020).
- 827 34 Uhlen, M. *et al.* Proteomics. Tissue-based map of the human proteome.  
828 *Science* **347**, 1260419, doi:10.1126/science.1260419 (2015).
- 829 35 Street, K. *et al.* Slingshot: cell lineage and pseudotime inference for single-cell  
830 transcriptomics. *BMC Genomics* **19**, 477, doi:10.1186/s12864-018-4772-0  
831 (2018).
- 832 36 Mo, M. L. *et al.* Inhibition of the Wnt palmitoyltransferase porcupine  
833 suppresses cell growth and downregulates the Wnt/beta-catenin pathway in  
834 gastric cancer. *Oncol Lett* **5**, 1719-1723, doi:10.3892/ol.2013.1256 (2013).
- 835 37 Chacon-Martinez, C. A., Koester, J. & Wickstrom, S. A. Signaling in the stem  
836 cell niche: regulating cell fate, function and plasticity. *Development* **145**,  
837 doi:10.1242/dev.165399 (2018).
- 838 38 Zhu, G., Hu, J. & Xi, R. The cellular niche for intestinal stem cells: a team effort.  
839 *Cell Regen* **10**, 1, doi:10.1186/s13619-020-00061-5 (2021).
- 840 39 Agoston, A. T. *et al.* Columnar-Lined Esophagus Develops via Wound Repair  
841 in a Surgical Model of Reflux Esophagitis. *Cell Mol Gastroenterol Hepatol* **6**,  
842 389-404, doi:10.1016/j.jcmgh.2018.06.007 (2018).
- 843 40 Sebastianelli, L. *et al.* Systematic Endoscopy 5 Years After Sleeve  
844 Gastrectomy Results in a High Rate of Barrett's Esophagus: Results of a  
845 Multicenter Study. *Obes Surg* **29**, 1462-1469, doi:10.1007/s11695-019-  
846 03704-y (2019).
- 847 41 Macfarlane, S., Furrie, E., Macfarlane, G. T. & Dillon, J. F. Microbial  
848 colonization of the upper gastrointestinal tract in patients with Barrett's  
849 esophagus. *Clin Infect Dis* **45**, 29-38, doi:10.1086/518578 (2007).
- 850 42 Ajayi, T. A., Cantrell, S., Spann, A. & Garman, K. S. Barrett's esophagus and  
851 esophageal cancer: Links to microbes and the microbiome. *PLoS Pathog* **14**,  
852 e1007384, doi:10.1371/journal.ppat.1007384 (2018).
- 853 43 Glickman, J. N., Chen, Y. Y., Wang, H. H., Antonioli, D. A. & Odze, R. D.  
854 Phenotypic characteristics of a distinctive multilayered epithelium suggests  
855 that it is a precursor in the development of Barrett's esophagus. *Am J Surg*  
856 *Pathol* **25**, 569-578, doi:10.1097/00000478-200105000-00002 (2001).
- 857 44 Sandilands, A. *et al.* Generation and characterisation of keratin 7 (K7) knockout  
858 mice. *PLoS One* **8**, e64404, doi:10.1371/journal.pone.0064404 (2013).
- 859 45 Karantza, V. Keratins in health and cancer: more than mere epithelial cell  
860 markers. *Oncogene* **30**, 127-138, doi:10.1038/onc.2010.456 (2011).
- 861 46 Alarmo, E. L. *et al.* Bone morphogenetic protein 4 expression in multiple normal  
862 and tumor tissues reveals its importance beyond development. *Mod Pathol* **26**,  
863 10-21, doi:10.1038/modpathol.2012.128 (2013).
- 864 47 Markouli, C. *et al.* Sustained intrinsic WNT and BMP4 activation impairs hESC  
865 differentiation to definitive endoderm and drives the cells towards extra-  
866 embryonic mesoderm. *Sci Rep* **11**, 8242, doi:10.1038/s41598-021-87547-7  
867 (2021).
- 868 48 Sankoda, N. *et al.* Epithelial expression of Gata4 and Sox2 regulates  
869 specification of the squamous-columnar junction via MAPK/ERK signaling in  
870 mice. *Nat Commun* **12**, 560, doi:10.1038/s41467-021-20906-0 (2021).

- 871 49 Kim, B. M., Buchner, G., Miletich, I., Sharpe, P. T. & Shivdasani, R. A. The  
872 stomach mesenchymal transcription factor Barx1 specifies gastric epithelial  
873 identity through inhibition of transient Wnt signaling. *Dev Cell* **8**, 611-622,  
874 doi:10.1016/j.devcel.2005.01.015 (2005).
- 875 50 Woo, J., Miletich, I., Kim, B. M., Sharpe, P. T. & Shivdasani, R. A. Barx1-  
876 mediated inhibition of Wnt signaling in the mouse thoracic foregut controls  
877 tracheo-esophageal septation and epithelial differentiation. *PLoS One* **6**,  
878 e22493, doi:10.1371/journal.pone.0022493 (2011).
- 879 51 Trisno, S. L. *et al.* Esophageal Organoids from Human Pluripotent Stem Cells  
880 Delineate Sox2 Functions during Esophageal Specification. *Cell Stem Cell* **23**,  
881 501-515 e507, doi:10.1016/j.stem.2018.08.008 (2018).
- 882 52 Rock, J. R. *et al.* Basal cells as stem cells of the mouse trachea and human  
883 airway epithelium. *Proc Natl Acad Sci U S A* **106**, 12771-12775,  
884 doi:10.1073/pnas.0906850106 (2009).
- 885 53 Van Keymeulen, A. *et al.* Distinct stem cells contribute to mammary gland  
886 development and maintenance. *Nature* **479**, 189-193,  
887 doi:10.1038/nature10573 (2011).
- 888 54 Madisen, L. *et al.* A robust and high-throughput Cre reporting and  
889 characterization system for the whole mouse brain. *Nat Neurosci* **13**, 133-140,  
890 doi:10.1038/nn.2467 (2010).
- 891 55 Ritchie, M. E. *et al.* limma powers differential expression analyses for RNA-  
892 sequencing and microarray studies. *Nucleic Acids Res* **43**, e47,  
893 doi:10.1093/nar/gkv007 (2015).
- 894 56 The Gene Ontology, C. The Gene Ontology Resource: 20 years and still GOing  
895 strong. *Nucleic Acids Res* **47**, D330-D338, doi:10.1093/nar/gky1055 (2019).
- 896 57 Yu, G., Wang, L. G., Han, Y. & He, Q. Y. clusterProfiler: an R package for  
897 comparing biological themes among gene clusters. *OMICS* **16**, 284-287,  
898 doi:10.1089/omi.2011.0118 (2012).
- 899 58 McGinnis, C. S. *et al.* MULTI-seq: sample multiplexing for single-cell RNA  
900 sequencing using lipid-tagged indices. *Nat Methods* **16**, 619-626,  
901 doi:10.1038/s41592-019-0433-8 (2019).
- 902 59 Hao, Y. *et al.* Integrated analysis of multimodal single-cell data. *Cell* **184**, 3573-  
903 3587 e3529, doi:10.1016/j.cell.2021.04.048 (2021).
- 904 60 Hafemeister, C. & Satija, R. Normalization and variance stabilization of single-  
905 cell RNA-seq data using regularized negative binomial regression. *Genome*  
906 *Biol* **20**, 296, doi:10.1186/s13059-019-1874-1 (2019).

907 **Figures and legends:**

Figure 1

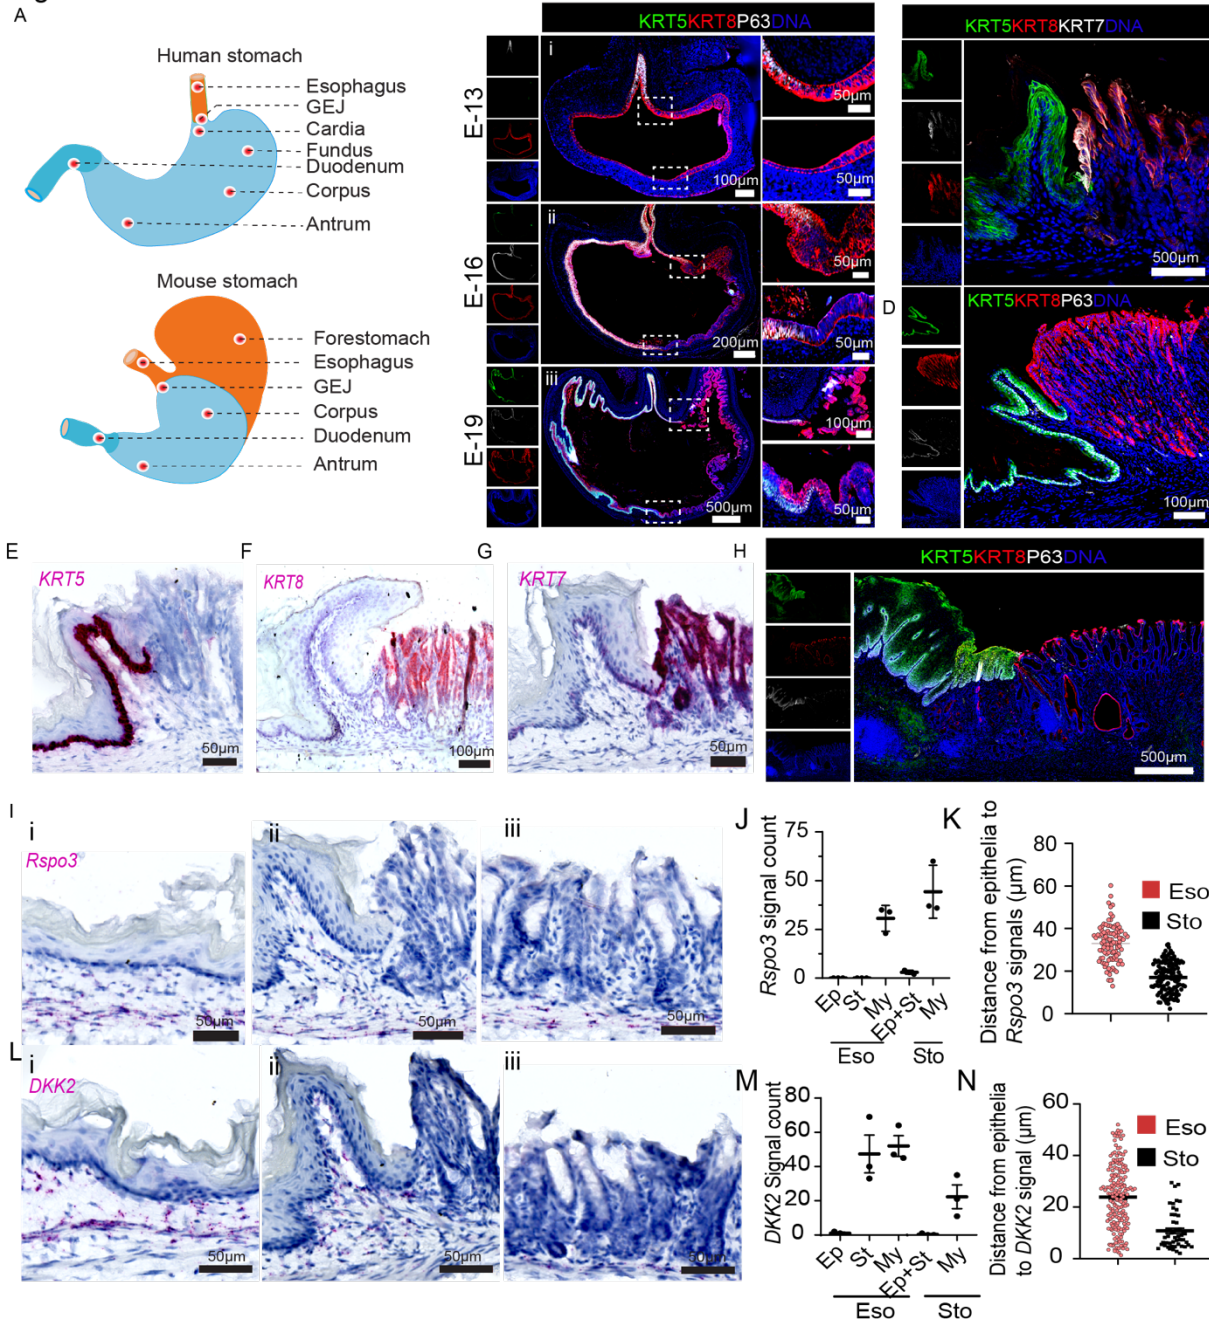

908

909 **Figure 1. Epithelial cell types and stromal microenvironment define the**  
 910 **gastroesophageal junction's spatial organisation.** (A) Schematic of human and  
 911 mouse esophagus and stomach anatomy, including gastroesophageal junction (GEJ).  
 912 GEJ in postnatal humans is formed where the distal squamous stratified epithelium  
 913 lined esophagus joins the proximal columnar epithelium of the stomach (cardia). In  
 914 mouse stratified epithelium lines, the esophageal and forestomach that opens into  
 915 columnar epithelium lined stomach forming GEJ. (B) Tiled images of tissue sections

916 from stomachs of embryonic day 13 (E-13) (i), E-16 (ii) and E-19 (iii) mice stained with  
917 KRT5 (green), KRT8 (Red), P63 (white) and nuclei stained with DAPI (blue). A  
918 magnified view of the boxed GEJ regions is shown in the right panel. (C-D) Tiled  
919 images of adult mouse GEJ tissue stained with KRT5 (green), KRT8 (Red), KRT7  
920 (white) (C) and KRT5 (green), KRT8 (Red), P63 (white) (D) nuclei were stained with  
921 DAPI (blue). (E-G) smRNA-ISH images of mouse GEJ tissue probed with *Krt5*, *Krt8*  
922 and *Krt7*. Nuclei are labelled with blue. (H) Tiled image of adult human GEJ tissue  
923 sections stained with KRT5 (green), KRT8 (Red), P63 (white), and nuclei stained with  
924 DAPI (blue). (I-N) smRNA-ISH images for the Wnt pathway genes *Rspo3* (I) and *Dkk2*  
925 (L) in the mouse esophagus tissue (i), GEJ (ii), and stomach glands (iii). Nuclei are  
926 labelled with blue. Quantification of *Rspo3* (J) and *Dkk2* (M) signal counts in Epithelia  
927 (Ep), stroma (St), and Myofibroblast (My) in the mouse GEJ tissue regions, distance  
928 ( $\mu\text{m}$ ) from epithelia to *Rspo3* (K) and *Dkk2* signal (N). Signal counts were performed  
929 from three non-overlapping  $100 \mu\text{m}^2$  areas of the image. Images are representative of  
930  $n=3$  mice or human donors . Tiled images shown in B-I, L were acquired with an  
931 AxioScan imager.

932

933

934

935

936

937

938

939

940

941

942

943



Supplementary Figure 1

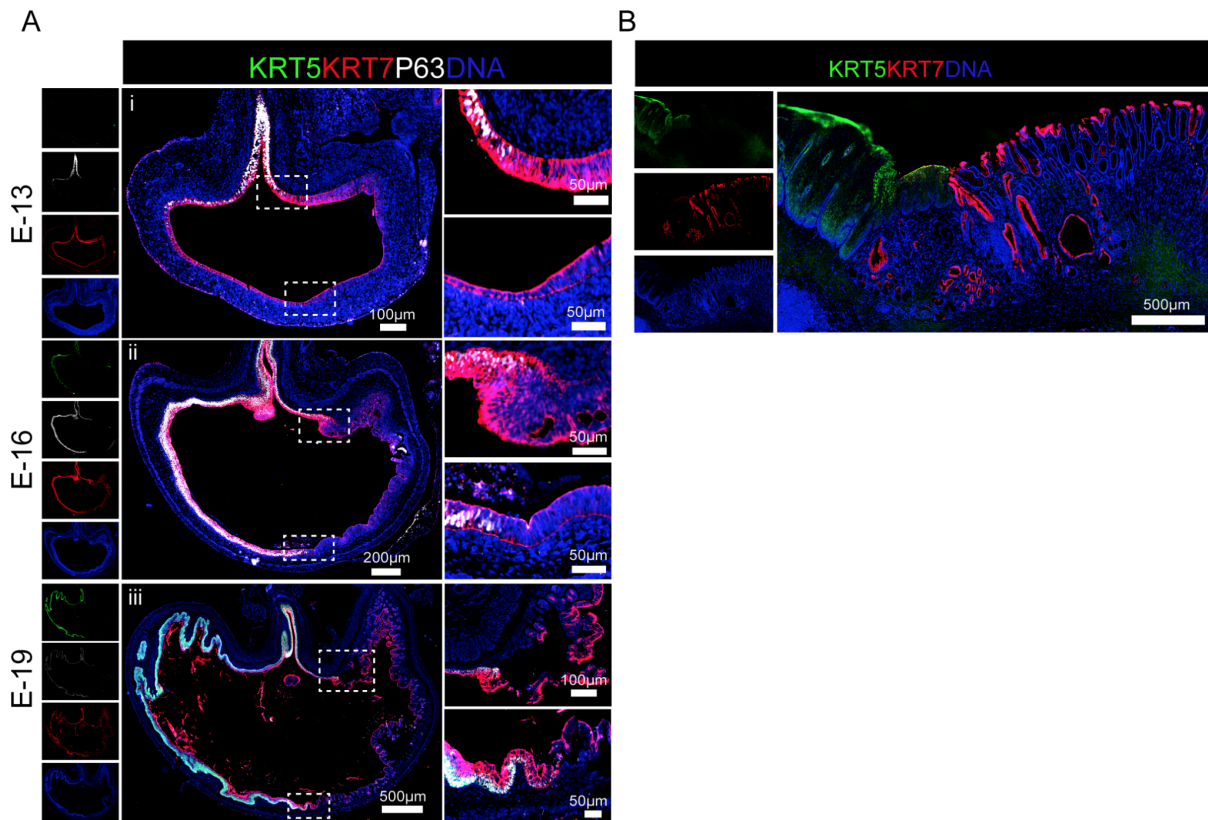

944

945

946 **Figure S1. Distinct cytokeratins mark stratified squamous esophageal and**  
947 **columnar stomach epithelium.** (A) Tiled images of tissue sections from mouse  
948 stomach from embryonic day 13 (E-13) (i), E-16 (ii), and E-19 (iii) stained with KRT5  
949 (green), KRT7 (Red), P63 (white). Nuclei are stained with DAPI (blue). A magnified view  
950 of the boxed GEJ regions is shown in the right panel. (B) Tiled images of adult healthy  
951 human GEJ tissue sections stained with KRT5 (green), KRT7 (Red) and nuclei stained  
952 with DAPI (blue). Images are representative of n=3 mice or human donors. Tiled  
953 images were acquired with an AxioScan imager.

954

955

956

957

958

959

Figure 2

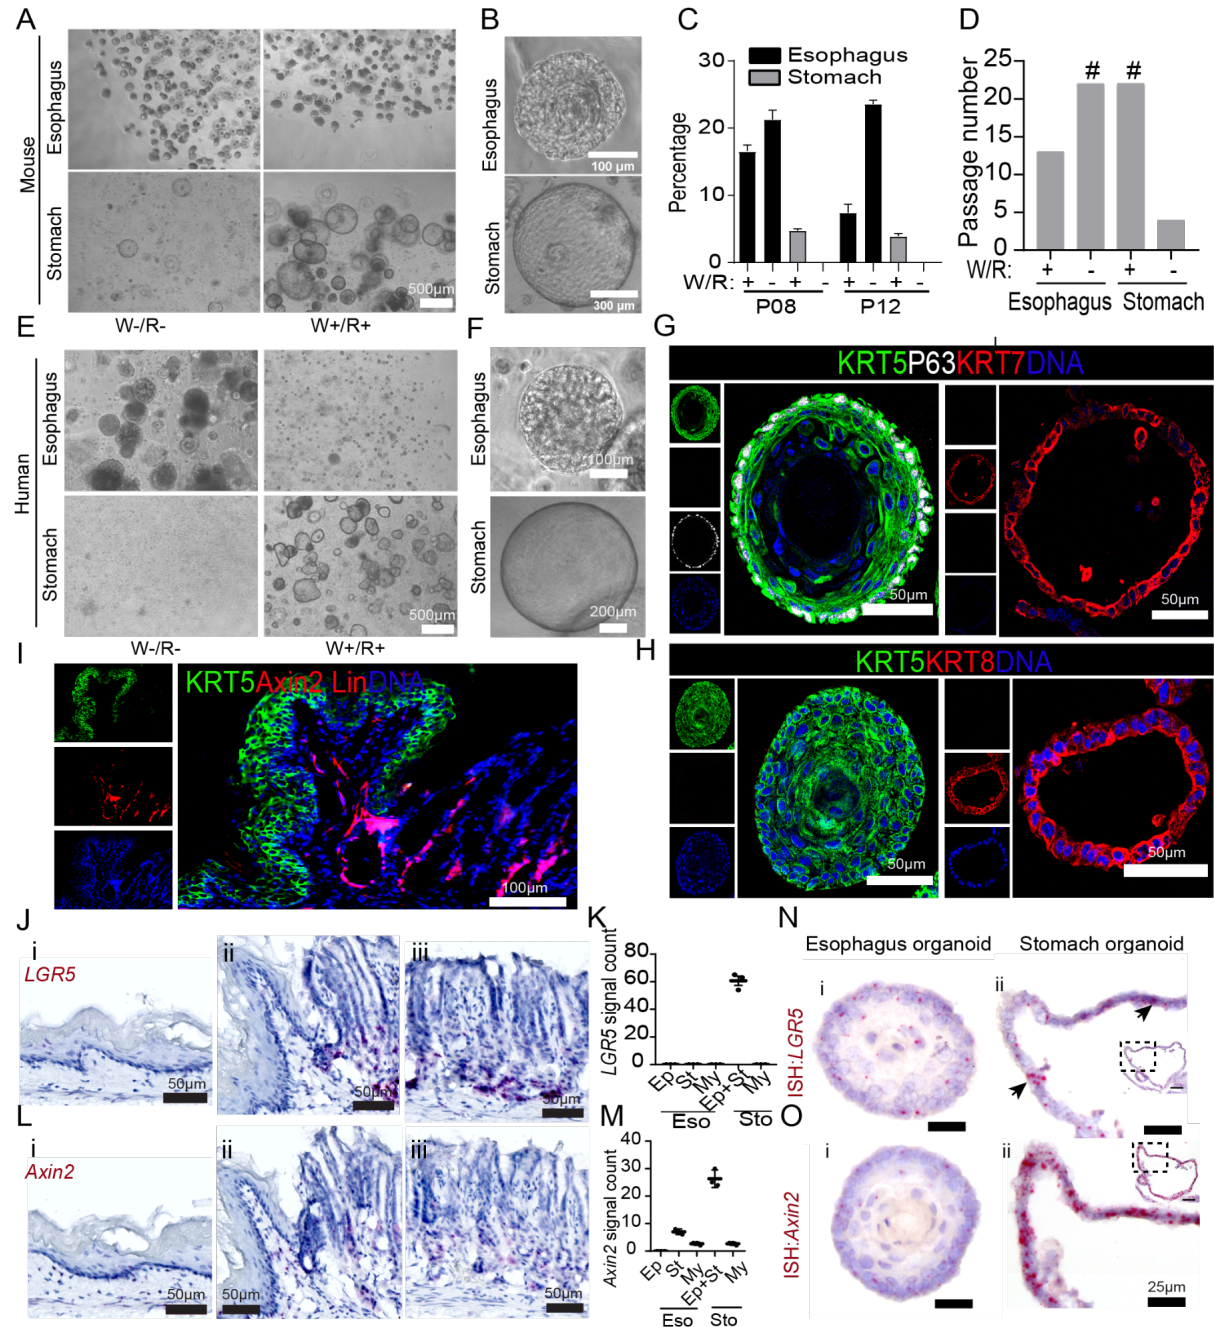

960

961

962

963

964

965

966

967

968

**Figure 2. Esophageal stratified and columnar stomach organoid growth depend on the distinct Wnt microenvironmental factors.** (A) Bright-field images of mouse squamous esophageal and columnar stomach organoids grown in the presence or absence of WNT3A (W) and R-spondin1 (R). (B) Higher magnification bright-field images of esophagus and stomach organoids grown in W-/R- and W+/R+ media, respectively. (C) Percentage of organoid formation from esophagus and stomach

969 epithelial stem cells grown either in W-/R- and W+/R+ culture at indicated passage  
970 (P) number. n= mean+/-SD of three biological replicates. (D) Long term passaging of  
971 esophageal and stomach organoids in W-/R- and W+/R+ culture media. '#' indicates  
972 organoids retained passaging ability beyond the indicated number. (E-F) Bright-field  
973 images of human squamous esophagus and columnar stomach organoids grown in  
974 W+/R+ or W-/R- media (E) and higher magnification bright-field images of the human  
975 esophagus and stomach organoid grown in W-/R- and W+/R+ media, respectively  
976 (F). (G-H) Confocal images of esophageal organoid (left panel) and stomach organoid  
977 (right panel) immunolabeled for KRT5 (green), KRT7 (Red), P63 (white) (G), KRT5  
978 (green), KRT8 (Red) (H) and nuclei in blue. (I) Tiled images of GEJ sections from 17  
979 weeks old *Axin2-Cre<sup>ERT2</sup>/Rosa26-tdTomato* mice after tamoxifen induction at the age  
980 of 4 weeks. Squamous epithelial cells were immunostained with KRT5 antibody  
981 (green), Axin2 lineage traced cells marked by Tdtomato (red), nuclei in blue. (J-M)  
982 smRNA-ISH images for the Wnt pathway genes *Lgr5* (J) and *Axin2* (L) in the mouse  
983 esophagus tissue (i), stomach gland at GEJ (ii), and in stomach glands (iii). Nuclei in  
984 blue. Quantification of *Axin2* (K) and *Lgr5* (M) signal counts in epithelia (Ep), stroma  
985 (St), and myofibroblast (My) in the esophageal and stomach tissue regions. Signal  
986 counts were performed in three non-overlapping 100  $\mu\text{m}^2$  area of images. (N-O)  
987 smRNA-ISH images of mouse esophageal (i) and stomach (ii) organoids probed with  
988 *Lgr5* (N) and *Axin2* (O). Nuclei in blue. Inset image showing the whole organoid, A  
989 black arrow pointing to *Lgr5* expressing cells in the stomach organoid. Images in A-  
990 B and E-O are representative of n= 3 mice or human donors.

991

992

993

994

995

996

Figure 3

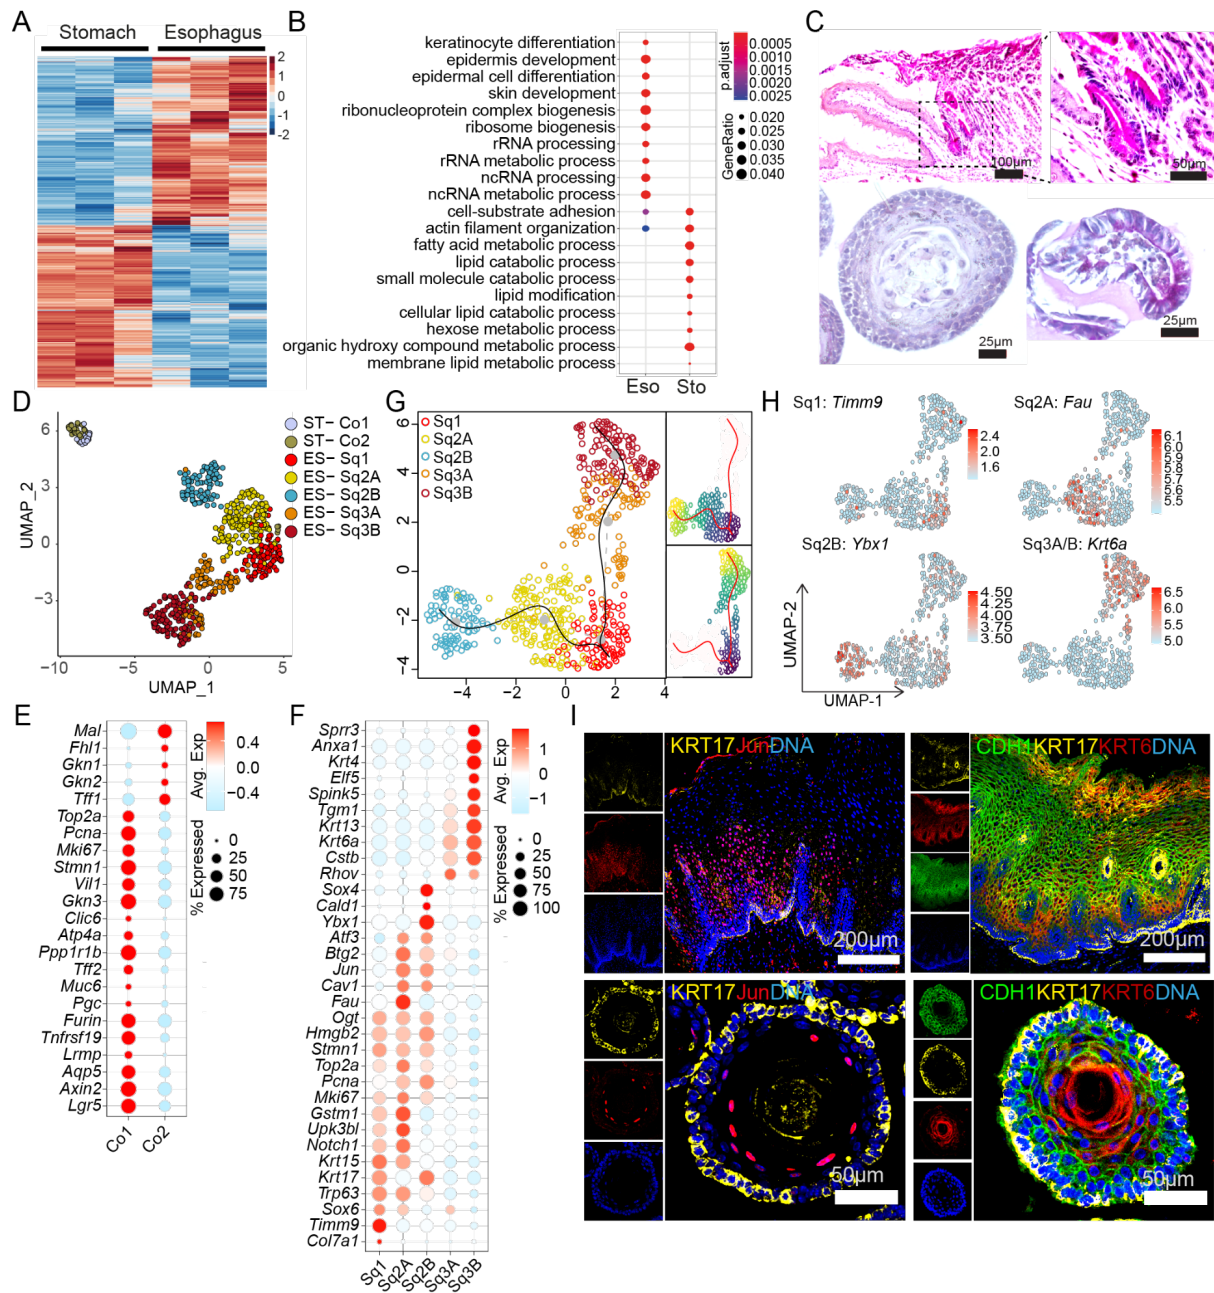

997

998

999 **Figure 3. Bulk and single-cell transcriptomics of esophageal and stomach**

1000 **organoids reveal cellular subpopulation and lineage-specific signatures. (A)** Heat

1001 map showing differentially expressed genes (DEG) in esophagus versus stomach

1002 organoids. Columns represent organoids derived from individual mice. The colour bar

1003 represents z-scored gene expression. (B) Top 10 enriched gene ontology (GO) terms

1004 associated with DEG between esophageal and stomach organoids. (C) PAS staining

1005 of mouse GEJ tissue section (i), esophageal organoid (ii) and stomach organoid (iii).

1006 (D) UMAP of scRNA-seq data derived from esophageal and stomach organoids

1007 showing cellular subclusters of each epithelium. Single cells are colour coded by  
1008 cluster annotation (ST, stomach; ES, esophagus; Sq, squamous). (E-F) Dot plot  
1009 depicting the expression of selected marker genes specific for stomach (E) and  
1010 esophagus (F) epithelial subclusters. Circle size indicates the percentage of cells  
1011 expressing indicated genes. Fill colour depicts the normalised and scaled mean  
1012 expression levels from high (red) to low (blue). (G) UMAP showing the reconstruction  
1013 of pseudo time trajectories in esophagus epithelial subclusters originating from Sq1.  
1014 (H) Normalized expression values of selected markers colour coded on UMAP  
1015 representing esophageal epithelial subclusters. (D-H) n= 3 biologically independent  
1016 experiments. (I) Confocal images for the human tissue (upper panel) and mouse  
1017 esophagus organoids (lower panel), stained with KRT17, Jun, KRT6 and CDH1.  
1018 Nuclei were stained with DAPI (blue). Images represent 3 independent biological  
1019 replicates.

1020

1021

1022

1023

1024

1025

1026

1027

1028

1029

1030

1031

## Supplementary Figure 2

A

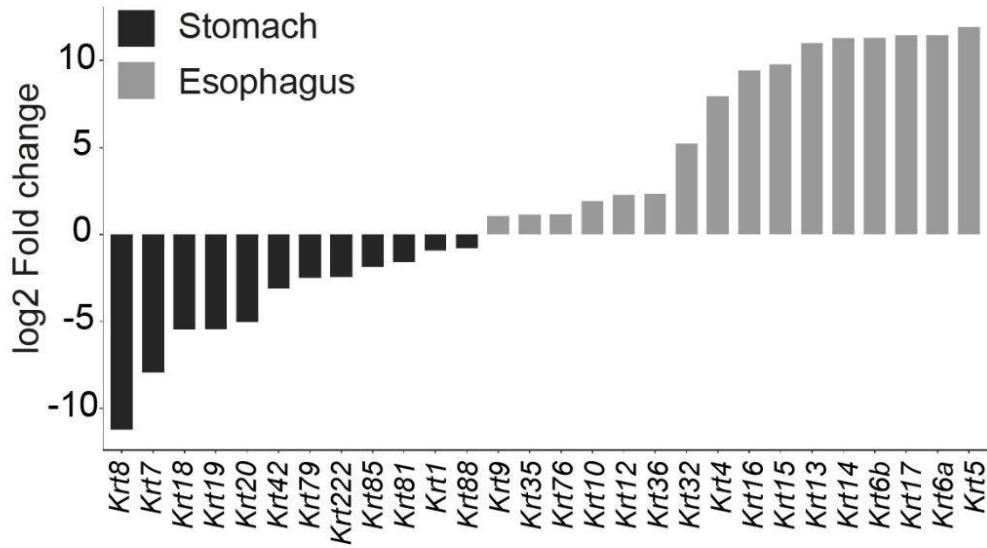

B

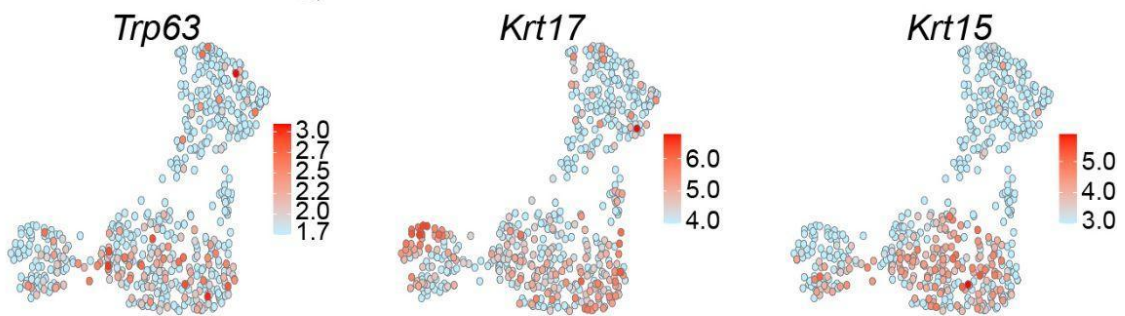

C

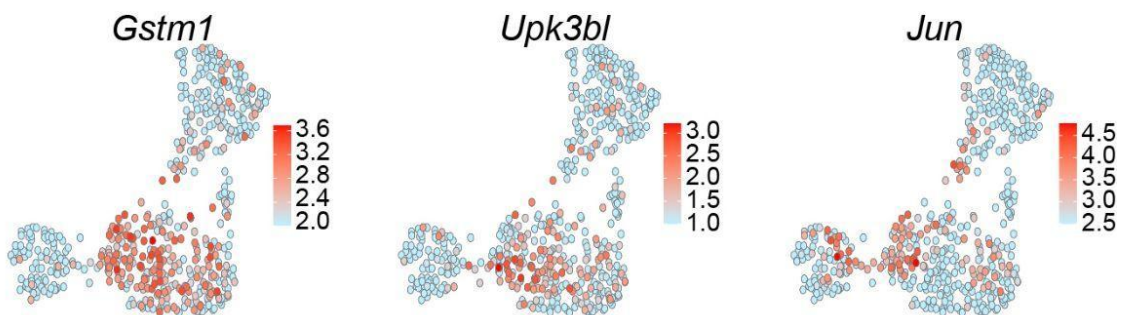

D

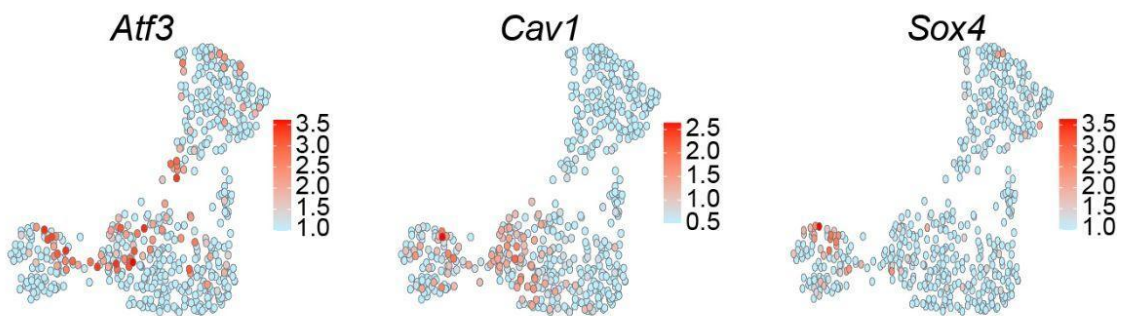

E

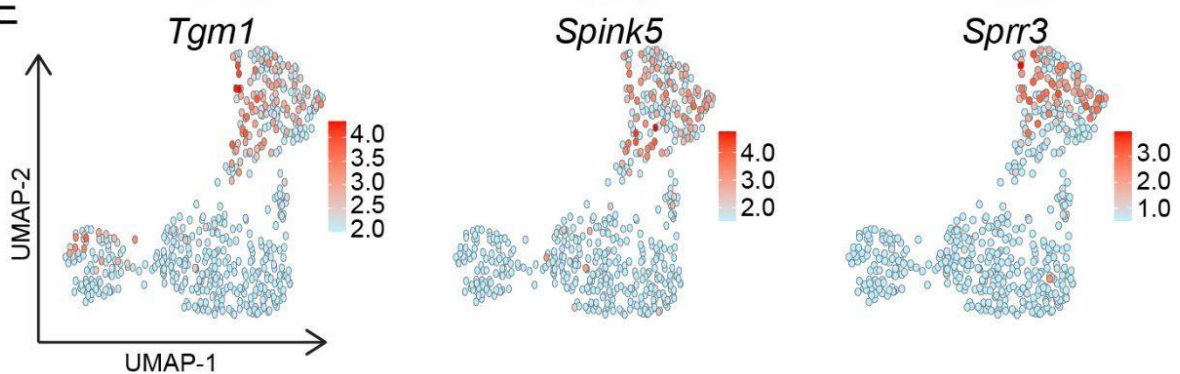

1033 **Figure S2: Distinct expression of genes in stomach versus esophagus and**  
1034 **subclusters of esophagus epithelium.** (A) Bar plot depicting Log2FC of differentially  
1035 expressed cytokeratin genes between mouse esophageal and stomach organoids,  
1036 revealing a distinct expression profile. (B-E) Normalised expression values of selected  
1037 markers colour coded on UMAP representing esophageal epithelial subclusters as in  
1038 Fig 3 D, F, G for Sq1 (B), Sq2A (C), Sq2B (D), Sq3A and Sq3B (E). n = 3 biologically  
1039 independent experiments.

1040

1041

Figure 4

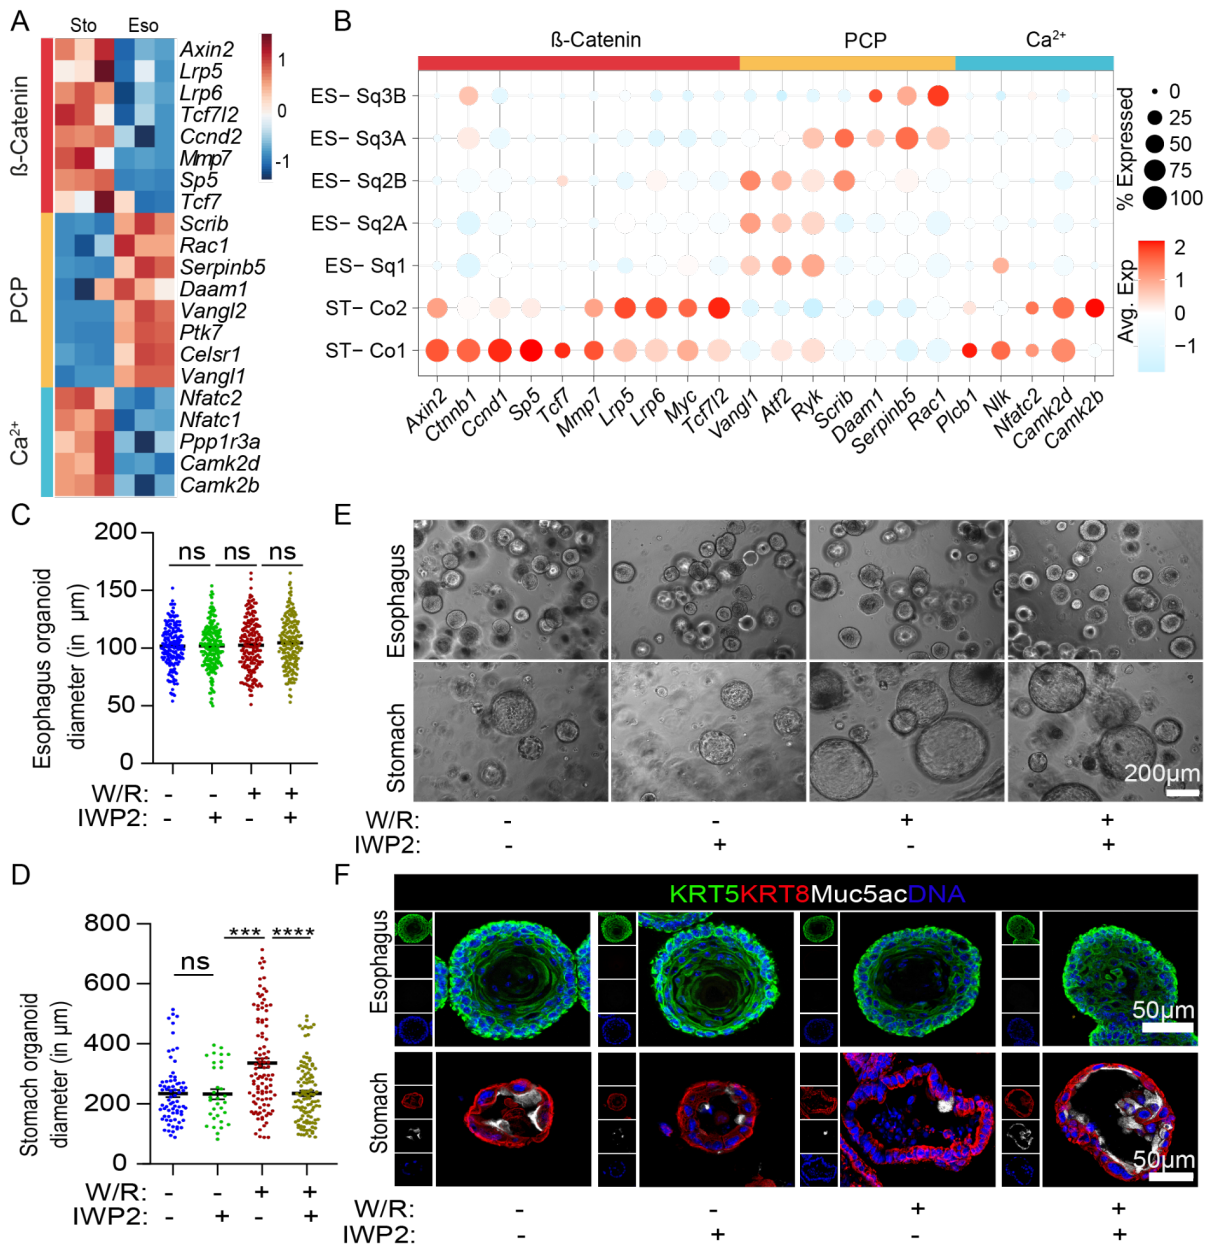

1042

1043 **Figure 4. Canonical and non-canonical Wnt signaling in gastroesophageal**

1044 **epithelial regeneration.** (A) Heat map showing expression of differentially regulated

1045 Wnt signalling pathway genes in esophagus versus stomach organoids. Columns

1046 represent organoids derived from 3 individual mice. The colour bar represents z-

1047 scored gene expression. (B) Dot plot depicting expression of canonical and non-

1048 canonical Wnt pathway associated genes in the stomach and esophagus epithelial

1049 subclusters. Circle size indicates the percentage of cells expressing an indicated

1050 gene. Fill colour depicts the normalised and scaled mean expression levels from high

1051 (red) to low (blue). (C-F) Mouse stomach and esophagus organoids were grown in



1052 W+/R+ or W-/R- culture medium, additionally either treated or untreated with 5  $\mu$ M  
1053 WNT secretion inhibitor IWP2. Organoid size in diameter was measured for  
1054 esophageal squamous organoids,  $n \geq 183$  (C); and stomach columnar organoids,  $n \geq$   
1055 32 (D).  $n$ = number of organoids measured from 3 biological replicates. ns= Non  
1056 significant, \*\*\* = $p < .01$ , \*\*\*\*= $p < .0001$ . (E) Bright-field images representing the  
1057 esophagus and stomach organoids. (F) Confocal images of esophageal organoid and  
1058 stomach organoid immunolabeled with KRT5 (green), KRT8 (Red), Muc5ac (white),  
1059 and nuclei stained with DAPI (blue). Images in E and F are representative of  $n = 3$  mice.

1060

1061

1062

1063

1064

1065

1066

1067

Figure 5

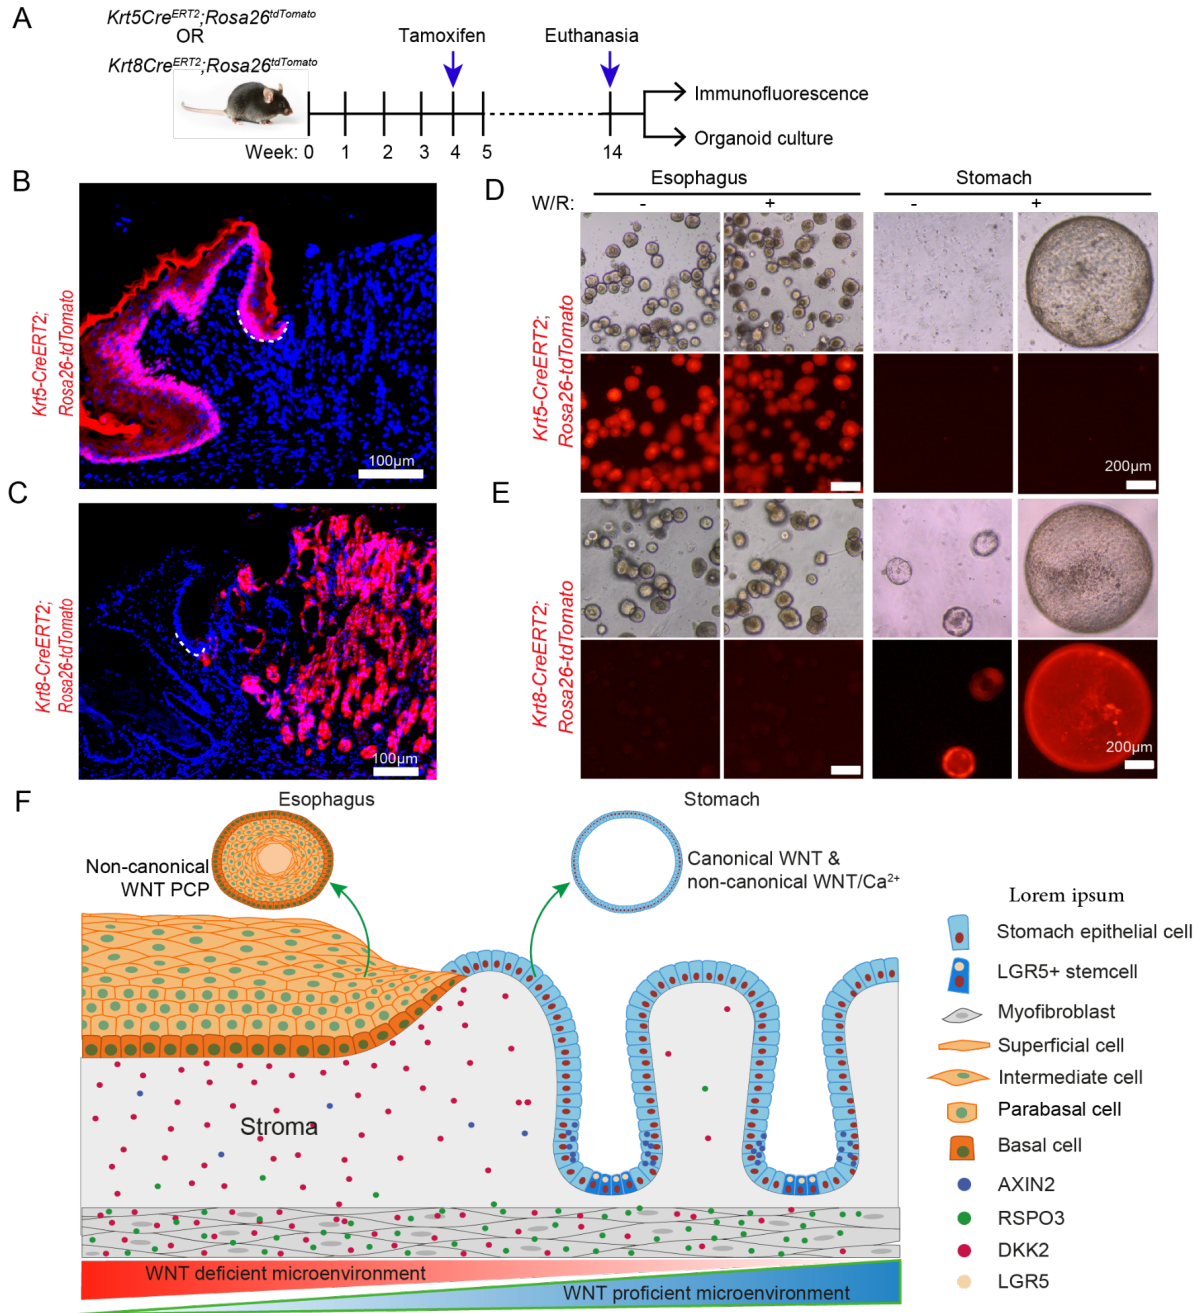

1068

1069

1070 **Figure 5: KRT5+ esophageal and KRT8+ stomach epithelial stem cells do not**  
 1071 **transdifferentiate under altered Wnt microenvironmental conditions.** (A) Diagram  
 1072 representing the treatment scheme for lineage tracing of mice either expressing *Krt5-*  
 1073 *Cre<sup>ERT2</sup>;Rosa26-tdTomato* or *Krt8-Cre<sup>ERT2</sup>;Rosa26-tdTomato*. Cre recombinase was  
 1074 induced in mice by administering tamoxifen intraperitoneally at the age of 4 weeks on  
 1075 two consecutive days. Mice were euthanised in the 14th week, gastroesophageal  
 1076 tissues were either fixed for immunofluorescence or used to isolate esophagus and

1077 stomach epithelial cells to culture organoids. (B-C) Tiled images of GEJ from tissue  
1078 sections of 14 weeks old *Krt5-Cre<sup>ERT2</sup>;Rosa26-tdTomato* (B) and *Krt8-Cre<sup>ERT2</sup>;Rosa26-*  
1079 *tdTomato* (C) after Tamoxifen induction at the age of 4 weeks. Nuclei stained with  
1080 DAPI (blue). The white dotted line indicates the basal cells of squamous epithelial  
1081 cells in the esophagus near GEJ. (D-E) Organoids cultured in the absence and  
1082 presence of (W/R) in the culture media from the lineage traced mice expressing either  
1083 *Krt5-Cre<sup>ERT2</sup>;Rosa26-tdTomato* epithelial (D) and *Krt8-Cre<sup>ERT2</sup>;Rosa26-tdTomato*  
1084 epithelial (E). (F) Schematic representation of distinct epithelial lineages and the  
1085 underlying microenvironment in normal GEJ homeostasis. Data in B-E are  
1086 representative of n= 3 mice.
